1 **Altered tRNA processing is linked to a distinct and unusual La protein**  
2 **in *Tetrahymena thermophila***

3 Kerkhofs, Kyra<sup>1</sup>; Garg, Jyoti<sup>1</sup>; Fafard-Couture, Étienne<sup>2</sup>; Abou Elela, Sherif<sup>3</sup>; Scott,  
4 Michelle<sup>2</sup>; Pearlman, Ronald E.<sup>1</sup>; Bayfield, Mark A.<sup>1\*</sup>

5 <sup>1</sup> Department of Biology, Faculty of Science, York University, Toronto, Ontario M3J 1P3,  
6 Canada,

7 <sup>2</sup> Département de Biochimie et de Génomique Fonctionnelle, Faculté de Médecine et  
8 des Sciences de la Santé, Université de Sherbrooke, Sherbrooke, Québec, J1E 4K8,  
9 Canada,

10 <sup>3</sup> Département de Microbiologie et d'Infectiologie, Faculté de Médecine et des Sciences  
11 de la Santé, Université de Sherbrooke, Sherbrooke, Québec, J1E 4K8, Canada.

12 \*Correspondence: [bayfield@yorku.ca](mailto:bayfield@yorku.ca) (M.A.B.)

13

14 **Abstract**

15 Nascent pre-tRNAs are transcribed by RNA polymerase III and immediately bound by  
16 La proteins on the UUU-3'OH sequence, using a tandem arrangement of the La motif  
17 and an adjacent RNA recognition motif-1 (RRM1), resulting in protection from 3'-  
18 exonucleases and promotion of pre-tRNA folding. The *Tetrahymena thermophila* protein  
19 Mlp1 has been classified as a genuine La protein, despite the predicted absence of the  
20 RRM1. We found that Mlp1 functions as a La protein through binding of pre-tRNAs and  
21 affecting processing in *Tetrahymena thermophila* and when expressed in fission yeast.  
22 However, unlike in other examined eukaryotes, depletion of Mlp1 results in 3'-trailer

23 stabilization. We also observed that 3'-trailers in *Tetrahymena thermophila* are uniquely  
24 short relative to other examined eukaryotes, and that 5'-leaders have evolved to  
25 disfavour pre-tRNA leader/trailer pairing. Our data indicate that this variant Mlp1  
26 architecture is linked to an altered, novel mechanism of tRNA processing in  
27 *Tetrahymena thermophila*.

28

## 29 **Introduction**

30 RNA polymerase III transcription of nascent pre-tRNAs terminates after the synthesis of  
31 a stretch of uridylates on a 3'-trailer extension (UUU-3'OH). La is the first protein to bind  
32 these nascent pre-tRNAs on the uridylate stretch and assists with pre-tRNA folding<sup>1</sup>.  
33 Once the nascent pre-tRNA has acquired a tRNA-like structure, the endonuclease  
34 RNase P removes the 5'-leader of La-bound pre-tRNA, followed by endonucleolytic  
35 cleavage of the 3'-trailer by RNase Z<sup>2,3</sup>. As a result of 3'-end cleavage, the La protein no  
36 longer associates with the tRNA and can be recycled for processing of new nascent  
37 pre-tRNAs<sup>4</sup>. In addition to the La-dependent pathway, an alternative La-independent  
38 pre-tRNA processing pathway exists but the order of pre-tRNA processing is reversed:  
39 without 3'-trailer protection by La, the exonuclease Rex1 digests the 3'-trailer of the pre-  
40 tRNA before RNase P endonucleolytic cleavage of the 5'-leader<sup>5</sup>, and misfolded pre-  
41 tRNAs are also more prone to degradation through nuclear surveillance<sup>6</sup>. Thus, La  
42 binding to pre-tRNAs is hypothesized to establish and determine the order of 5'-leader  
43 versus 3'-trailer processing<sup>3</sup>. Once the 5'-leader and 3'-trailer sequences are processed,  
44 the nucleotidyltransferase adds a CCA sequence to the discriminator base at the 3'-end  
45 of the mature tRNA which will serve as the site of amino acid charging<sup>7</sup>.

46 Genuine La proteins are members of the La-related proteins (LARPs)<sup>8</sup>. Most LARP  
47 family members, and all genuine La proteins, contain an N-terminal La module  
48 consisting of two adjacent RNA-binding domains: a La motif (LaM) and an RNA  
49 recognition motif-1 (RRM1) (**Figure 1A**)<sup>9-11</sup>. In *Tetrahymena thermophila*, the LARP7  
50 ortholog p65 was until recently the only characterized LARP in this species<sup>8,12</sup>, but a  
51 recent study has grouped the *Tetrahymena* Macronucleus localized protein of unknown  
52 function (Mlp1)<sup>13</sup> with the genuine La proteins, based on its primary sequence  
53 conservation in the LaM<sup>12</sup>. Interestingly, Mlp1 only contains a highly conserved LaM,  
54 unlike all previously studied La proteins which contain the tandem LaM-RRM  
55 arrangement. This atypical La protein has been identified in several members of the  
56 alveolates<sup>12</sup>.

57 The absence of the RRM1 in the La module of a genuine La protein in alveolates is  
58 highly unexpected, due to the mechanism by which La proteins bind the uridylate  
59 containing 3'-trailer. Structural studies of the hLa LaM-RRM bound to UUU-3'OH  
60 revealed that both domains sandwich this RNA, and functional studies have  
61 demonstrated that the La module is indispensable and sufficient for uridylate binding<sup>9,14</sup>,  
62 as deletion of either the LaM or RRM1 results in complete loss of binding<sup>9,10,15,16</sup>.  
63 Another unusual feature of this new type of La protein is the presence of a domain of  
64 unknown function-3223 (DUF3223) in the C-terminal region<sup>12</sup>. Thus, questions remain  
65 as to whether Mlp1 functions as a genuine La protein, and if so, whether it uses a mode  
66 of RNA binding dissimilar to previously studied La proteins, with possible associated  
67 changes in how Mlp1 directs pre-tRNA processing.

68 Here, we present evidence that despite the apparent lack of the RRM1, Mlp1 functions  
69 as a genuine La protein. Using ribonucleoprotein immunoprecipitation (RIP)-Seq of  
70 Mlp1, we show association with UUU-3'OH containing pre-tRNAs *in vivo*, and  
71 preferential binding of pre-tRNA substrates over mature tRNA substrates *in vitro*.  
72 Furthermore, we demonstrate that Mlp1 expression in *Schizosaccharomyces pombe*  
73 promotes pre-tRNA processing and tRNA mediated suppression but without typical La-  
74 associated 3'-end protection. Genetic depletion of Mlp1 in *Tetrahymena* reveals that in  
75 contrast to previously studied La proteins, Mlp1 destabilizes pre-tRNA 3'-ends, thus  
76 acting as a factor that accelerates 3'-end processing. In addition, when comparing pre-  
77 tRNAs found in *Tetrahymena* with other eukaryotic species, we found that the 3'-trailer  
78 sequences are considerably shorter, and that 5'-leader sequences have evolved  
79 accordingly to disfavor base pairing at these shortened 3'-trailers. Together, our data  
80 are consistent with a model in which Mlp1 fulfills many expected functions of a genuine  
81 La protein but uses alternate RNA binding modes to promote a pre-tRNA processing  
82 pathway in *Tetrahymena* that differs from those found in other studied eukaryotic  
83 systems.

84

## 85 **Results**

### 86 **Mlp1 is predicted to lack an RRM adjacent to the LaM**

87 To investigate primary amino acid sequence conservation, multiple sequence  
88 alignments were conducted for La proteins from different eukaryotic lineages. We  
89 confirm that residues important for uridylylate binding in the LaM are mostly conserved in

90 *Tetrahymena* (**Figure 1B, Figure S1A,C-D**). In contrast, we found little to no  
91 conservation of residues in the region of the adjacent domain where the RRM1 would  
92 be located (**Figure S1B**).

93 When comparing primary sequences of the La module between different LARPs, the  
94 presence of an RRM1 domain could often only be inferred from secondary structure  
95 predictions<sup>8</sup>. Therefore, we compared the secondary structure predictions for  
96 *Tetrahymena* La with secondary structures for different eukaryotes (**Figure 1C**). These  
97 consistently predicted an RRM fold immediately C-terminal to the LaM in all species  
98 examined, except for candidate alveolate La proteins.

99

#### 100 **Mlp1 preferentially binds pre-tRNAs in *Tetrahymena thermophila***

101 We hypothesized that should Mlp1 function as a genuine La protein, it should bind and  
102 promote the processing of RNA polymerase III transcripts, as has been demonstrated in  
103 budding and fission yeast<sup>2,3</sup>. We immunoprecipitated Mlp1-associated RNAs followed  
104 by detection by Northern blot (**Figure 2A, Figure S2A**). Using probes specific for pre-  
105 tRNA 3'-extensions, we confirmed that Mlp1 immunoprecipitation enriched pre-tRNA  
106 species relative to mature tRNAs, which were relatively more abundant in input RNA  
107 fractions. We also observed lesser enrichment of the U5 small nuclear RNA (snRNA),  
108 which is consistent with data indicating association of La proteins with processing  
109 intermediates of U5 in *Saccharomyces cerevisiae*<sup>17</sup>. We conclude that based on its  
110 expected RNA target cohort, Mlp1 behaves as expected for a genuine La protein.

111 To investigate Mlp1-associated RNAs more extensively, we sequenced Mlp1-  
112 immunoprecipitated RNAs after removing larger RNAs (> 300 nt) by gel electrophoresis.  
113 As expected for a genuine La protein, we observed an enrichment of reads mapping to  
114 pre-tRNA genes carrying 3'-uridylylate extensions relative to their normalized abundance  
115 in size-matched input samples (**Figure 2B** – Mlp1). In contrast, mature tRNAs are not  
116 enriched in Mlp1-bound samples (**Figure 2B** – Mlp1; averaged enrichment values for  
117 tRNA isotypes presented in **Figure S2B**). We compared our dataset with a previous  
118 study in which hLa-bound tRNA reads were obtained by photoactivatable crosslinking  
119 and immunoprecipitation (PAR-CLIP) and where tRNA sequencing of input and  
120 immunoprecipitated RNA was done using hydro-tRNAseq<sup>18</sup> and found a similar  
121 enrichment for 3'-uridylylate containing pre-tRNAs (**Figure 2B** – hLa; averaged  
122 enrichment values for tRNA isotypes presented in **Figure S2C**). The relative enrichment  
123 of pre-tRNAs over mature tRNAs, are strongly indicative of Mlp1 functioning as a  
124 genuine La protein in *Tetrahymena*.

125

### 126 **Mlp1 preferentially binds pre-tRNA substrates *in vitro***

127 The hLa protein preferentially binds pre-tRNA substrates through engagement of  
128 multiple sites, including the pre-tRNA body, 3'-trailer and 5'-leader<sup>4,19</sup>. To determine  
129 whether enrichment of Mlp1 associated pre-tRNAs relative to mature tRNAs correlated  
130 with changes in affinity for such ligands, we compared binding affinity of Mlp1 for *in vitro*  
131 transcribed mature tRNA versus pre-tRNA substrates using electromobility shift assays  
132 (EMSAs), as well as versions of these that included either or both of 5'-leader or 3'-  
133 trailer extensions (**Figure 2C**). We found that Mlp1 preferentially binds pre-tRNAs

134 containing both 5'- and 3'-extensions, followed by pre-tRNA containing the 3'-trailer  
135 (**Figure S2D,E, Table S1**). Lowest binding affinities were consistently found for mature  
136 tRNAs, confirming the *in vivo* preferential binding of pre-tRNAs (see **Figure S2D,E,**  
137 **Table S1**).

138 To further investigate Mlp1 tRNA binding, we compared the affinity of full-length Mlp1 or  
139 Mlp1 mutants to hLa for radioactively labeled tRNA targets by EMSA (**Figure 2D-I,**  
140 **Figure S3A, Table 1**). To test the importance of 3'-uridylylates binding, we compared  
141 Mlp1 to an Mlp1 mutant in which conserved amino acids predicted to recognize the  
142 UUU-3'OH motif were substituted (Q11A/Y14A)<sup>10,16</sup> (see **Figure 1B, Figure S1D,**  
143 Q20/Y23 numbering in hLa), as well as a mutant in which the entire LaM was deleted  
144 (Mlp1 95-340). We found that the increased affinity for pre-tRNAs was lost in the Mlp1  
145 Q11A/Y14A mutant (compare **Figure 2E and F**) as well as for the LaM deletion mutant  
146 (compare **Figure 2E and G**). In contrast, the C-terminal DUF3223 is not important to  
147 discriminate between pre-tRNA and mature tRNAs since removal of this domain (Mlp1  
148 1-250) maintains the binding affinity difference (**Figure 2H**), while the Q11A/Y14A  
149 mutations in the context of the deleted DUF3223 (Mlp1 1-250 Q11A/Y14A) again  
150 resulted in decreased affinity for pre-tRNAs (**Figure 2I**). To investigate UUU-3'OH  
151 binding more directly, we compared these Mlp1 mutants in protein-RNA binding  
152 experiments using a 3'-trailer sequence CUGUGUUUU-3'OH and we found that the  
153 predicted uridylylate binding residues located in the LaM (Q11A/Y14A) were required for  
154 binding (**Figure 2J**). Additionally, binding of 3'-uridylylate RNA occurs with the same  
155 affinity for Mlp1 1-250 compared to full length Mlp1, whereas affinity for uridylylate RNA is  
156 lost when both domains are used individually (Mlp1 1-95 and Mlp1 95-250) (**Figure**

157 **S3B**). These data suggest that despite the apparent lack of the RRM1, Mlp1 functions in  
158 a similar manner as the hLa protein in preferentially binding pre-tRNA substrates, and  
159 that predicted, conserved uridylate binding residues in the LaM promote higher affinity  
160 binding associated with the UUU-3'OH motif.

161 The hLa protein is known to also interact with the 5'-triphosphate containing end of the  
162 nascent pre-tRNA through a short basic motif located in the C-terminal part of the  
163 protein<sup>19</sup>. We tested the affinity of the 5'-triphosphate for Mlp1 by competition EMSA,  
164 using a 5'-leader containing, 3'-trailer processed *in vitro* transcribed radioactively  
165 labeled tRNA (+5'PPP) and unlabelled competitor tRNAs with the 5'-triphosphate  
166 removed after phosphatase treatment (-5'PPP; +/- 5'PPP demonstrated in **Figure S3C**).  
167 We found that the unlabelled -5'PPP substrate competed poorly relative to an  
168 unlabelled +5'PPP substrate for the radioactive +5'PPP substrate on hLa, (**Figure 2K –**  
169 compare -5'PPP and +5'PPP hLa, **Figure S3D**) but the difference in competition  
170 between these RNAs on Mlp1 was smaller (**Figure 2K – compare -5'PPP and +5'PPP**  
171 **Mlp1, Figure S3E**). These data are consistent with a lesser degree of 5'-leader  
172 discrimination for 5'PPP in Mlp1 relative to hLa.

173

#### 174 **Mlp1 binding to 3'-trailer RNAs is different from hLa**

175 To further study the distinct binding modes, we performed competition experiments  
176 between <sup>32</sup>P-labeled uridylate RNA (U10) and unlabelled competitor pre-tRNA and  
177 mature tRNA substrates. We used hLa as a control and found that, as expected from  
178 previous work<sup>4</sup>, pre-tRNAs were a stronger competitor for the uridylate binding pocket



179 than mature tRNAs (**Figure 3A, Figure S4A**). In contrast, uridylylate RNA was competed  
180 off of Mlp1 using only low amounts of either pre-tRNA or mature tRNA (**Figure 3B,**  
181 **Figure S4A**), suggesting that binding of uridylylates on Mlp1 is weaker compared to hLa.  
182 Previous high-resolution structural characterization of hLa bound to UUU-3'OH  
183 established that the penultimate uridylylate (UUU-3'OH) has the greatest importance for  
184 sequence specific, high affinity binding<sup>14,15</sup>. Previous high-resolution structural  
185 characterization of human La bound to UUU-3'OH established that the penultimate  
186 uridylylate (UUU-3'OH) has the greatest importance for sequence specific, high affinity  
187 binding<sup>15,16</sup>. Notably, this uridylylate is the only residue in the UUU-3'OH motif that  
188 contacts the RRM1 in hLa (**Figure 3C**). To compare the importance of the position of  
189 the penultimate uridylylate (two nucleotides from the 3'-end: U<sub>2</sub>), we performed  
190 competition EMSAs for hLa and Mlp1 using the radioactively labeled UUU-3'OH  
191 containing RNA CUGCUGUUUU-3'OH RNA (hence referred to as wild type 4U) and  
192 unlabelled RNAs carrying specific variations to this sequence. As expected, mutating  
193 the penultimate uridylylate (U<sub>2</sub>) into a cytidylate (U<sub>2</sub>C – CUGCUGUUC-3'OH) resulted  
194 in this RNA functioning as a poor competitor with hLa, whereas changes at the most 3'-  
195 terminal position (U<sub>1</sub>C) and the third last position (U<sub>3</sub>C) has a lesser effect on  
196 competition capability (**Figure 3D, Figure S4B**). Mutating the four last positions (4C –  
197 CUGCUGCCCC-3'OH) resulted in a total inability to compete with the wild type 4U RNA  
198 (**Figure 3D, Figure S4B**). In contrast, competition for Mlp1 between radioactively  
199 labeled 4U and any unlabelled variant RNA competitor (U<sub>1</sub>C, U<sub>2</sub>C and U<sub>3</sub>C) showed  
200 similar competition levels, indicating that the position of the penultimate uridylylate U<sub>2</sub> is  
201 not as important for interactions between Mlp1 and 3'-trailer sequences (**Figure 3E,**

202 **Figure S4C**). Interestingly, unlabelled competitor 4C was more capable of competition  
203 with wild type 4U RNA for binding on Mlp1. These data are also consistent with Mlp1  
204 discrimination for uridylate RNA not occurring as strongly as for hLa, and that the  
205 specificity of binding to the penultimate uridylate is weaker or absent for Mlp1.

206 The previous high-resolution work on hLa in complex with UUU-3'OH containing RNA  
207 also revealed the importance of the 2'- and 3'-hydroxyls for high affinity binding in the  
208 hydrophobic binding pocket between LaM and RRM1<sup>15,16</sup>, with two hydrogen bonds  
209 formed with an aspartate (**Figure 3F**) that is conserved in Mlp1 (see **Figure 1B, Figure**  
210 **S1D**). To investigate the importance of the free 3'-terminal hydroxyl groups for Mlp1  
211 binding, we used competition EMSAs comparing a regular U10 and a 3'-phosphorylated  
212 unlabeled competitor RNA. We found that for both hLa and Mlp1 the phosphorylated  
213 substrate makes a poor competitor, confirming that the presence of a 3'-hydroxyl end is  
214 important for interactions between Mlp1 and uridylates (**Figure 3G,H, Figure S4D**).  
215 Together, these results demonstrate that Mlp1 shows the same preference and LaM  
216 amino acid dependence for pre-tRNAs and UUU-3'OH binding as hLa, but that the  
217 altered architecture correlates with diminished discrimination for these substrates  
218 relative to hLa.

219

## 220 **RNA chaperone function of Mlp1 in an *Schizosaccharomyces pombe* based** 221 **heterologous system**

222 In addition to 3'-end protection of nascent pre-tRNAs from exonucleases, La proteins  
223 also possess RNA chaperone activity to enhance correct folding of nascent pre-

224 tRNAs<sup>4,20,21</sup>. We used a tRNA-mediated suppression assay to investigate the ability of  
225 Mlp1 to rescue a misfolded suppressor tRNA<sup>22</sup>. We transformed Sla1p, full-length Mlp1  
226 and multiple Mlp1 mutants into a *sla1-* *Schizosaccharomyces pombe* strain (ySH9)  
227 which encodes a defective stop codon UGA-decoding suppressor tRNA (tRNA-Ser<sup>UCA</sup>)  
228 as well as the *ade6-704* allele, which is decoded by a tRNA-Ser<sup>UCA</sup> to suppress red  
229 pigment accumulation during growth on low adenine. Successful suppression in this  
230 system relies on the presence of a La protein or other suitable RNA chaperone,  
231 resulting in white colonies versus red colonies in unsuppressed cells.

232 When comparing Sla1p-transformants to full-length Mlp1-transformants, we found that  
233 Mlp1 can stabilize the defective suppressor pre-tRNA similar to Sla1p (**Figure 4A**).  
234 Maturation of the defective suppressor tRNA can occur via 3'-terminal protection of  
235 uridylates from exonucleases, or general RNA chaperone activity, or a combination of  
236 these to assist with folding of pre-tRNAs<sup>6</sup>. To test the importance of the uridylate binding  
237 residues for suppression, we compared the Mlp1 Q11A/Y14A mutant and the LaM  
238 deletion mutant (Mlp1 95-340) to wild type Mlp1 and observed a pink phenotype  
239 indicating intermediate suppression levels despite equal levels of protein expression  
240 (**Figure 4A, Figure S5A**), suggesting that these uridylate binding residues function in  
241 maturation of the pre-tRNA *in vivo*. Next, we studied the function of the C-terminal  
242 DUF3223 and found that removal of this domain (Mlp1 1-250) led to near complete loss  
243 of suppression (**Figure 4A**), and combination of DUF3223 removal and uridylate binding  
244 inactivation (Mlp1 1-250 Q11A/Y14A) resulted in a complete loss of suppression  
245 (**Figure 4A**). These results indicate that to obtain complete tRNA mediated suppression,

246 both the conserved uridylate binding residues (Q11 and Y14) in the LaM and the C-  
247 terminal DUF3223 are required.

248 To investigate 3'-end protection more directly, we extracted total RNA from Mlp1- and  
249 Sla1p-expressing strains and analysed suppressor pre-tRNA Ser<sup>UCA</sup> processing by  
250 Northern blot (**Figure 4B**). We found that higher levels of suppressor pre-tRNA  
251 stabilization in Sla1p- and Mlp1-transformed strains (lanes 2, 3) corresponded to more  
252 mature suppressor tRNA which correlates with the white phenotype observed in the  
253 tRNA-mediated suppression results (**Figure 4A**), as opposed to the lack of pre-tRNA  
254 stabilization and subsequent mature suppressor tRNA in pRep4 control (lane 1)  
255 resulting in a red phenotype (**Figure 4A,B**). Interestingly, the most abundant pre-tRNA  
256 species was slightly smaller in Mlp1 transformed cells relative to Sla1p (see asterisk).  
257 We also detected endogenous pre-tRNAs Lys<sup>CUU</sup> processing intermediates using an  
258 intron, 5'-leader and a 3'-trailer probe (**Figure 4C**). The presence of the three La-  
259 dependent pathway pre-tRNA intermediates are detected after transformation of the  
260 positive control Sla1p<sup>23</sup> (**Figure 4C** – intron probe, compare lanes 1 and 2). Notably, we  
261 observed the appearance of a distinct pre-tRNA intermediate in Sla1 expressing cells  
262 when using a probe specific for the 5'-leader of pre-tRNA Lys<sup>CUU</sup> that did not co-migrate  
263 with any of the major species observed using the intron or 3'-trailer probe (**Figure 4C** –  
264 5'-leader, indicated by a double asterisk, beneath the full length pre-tRNA band). We  
265 hypothesize that this species represents a subset of pre-tRNAs that are not stably  
266 bound by Sla1p and whose 3'-ends have been nibbled by a 3'-exonuclease, yet have  
267 retained their 5'-leaders as has been described during La-independent pre-tRNA  
268 processing. As expected from the tRNA-mediated suppression assay, we found that

269 Mlp1 also stabilized endogenous precursor pre-tRNA Lys<sup>CUU</sup>, however, this precursor  
270 tRNA co-migrated with the 5'-leader containing, 3'-trailer exonuclease processed  
271 intermediate observed in Sla1p -transformants (**Figure 4C** – 5'-leader, compare lane 2  
272 and 3), consistent with Mlp1 stabilizing a 5'-leader containing, 3'-processed or nibbled  
273 pre-tRNA intermediate. As expected, all Mlp1 mutants defective in tRNA-mediation  
274 suppression were defective in stabilizing pre-tRNA intermediates. Together, these data  
275 are consistent with Mlp1 engaging pre-tRNAs and promoting tRNA-mediated  
276 suppression in *Schizosaccharomyces pombe*, but with impaired protections of pre-tRNA  
277 3'-ends relative to Sla1p.

278 To further compare Mlp1 and Sla1p function in the processing of pre-tRNA  
279 intermediates by Mlp1 in *Schizosaccharomyces pombe*, we immunoprecipitated Sla1p  
280 and Mlp1 ribonucleoprotein-complexes (**Figure S5B**) and sequenced the 3'-ends of  
281 their associated pre-tRNA Lys<sup>CUU</sup> and pre-tRNA Tyr<sup>GUA</sup> by 3'-rapid amplification of  
282 cDNA ends (3'RACE). While Sla1p-associated pre-tRNAs were enriched for species  
283 containing primarily four and five nucleotide long uridylate 3'-trailers, as has been  
284 described previously<sup>24</sup>, Mlp1-associated pre-tRNAs were largely depleted for 3'-trailer  
285 containing species (**Figure 4D**), consistent with the Northern blotting results (**Figure**  
286 **4B,C**). These data are consistent with our Mlp1 RNA binding data *in vitro*, indicating that  
287 Mlp1 promotes pre-tRNA processing but does not offer as strong protection of the 3'-  
288 ends of associated pre-tRNAs as other examined genuine La proteins.

289

290 **Reduced Mlp1 expression in *Tetrahymena thermophila* leads to impaired 3'-trailer**  
291 **processing**

292 To investigate the effect of Mlp1 depletion on pre-tRNA processing, we generated a  
293 partial *MLP1* knockout strain and confirmed genomic integration of the selection marker  
294 by Southern blot and PCR (**Figure S6A,B** and data not shown) and reduced protein  
295 expression of Mlp1 by Western blot (**Figure 5A**) and indirect immunofluorescent  
296 staining (**Figure S6C**). Notably, complete deletion of the *MLP1* locus in *Tetrahymena*  
297 macronuclei through increasing drug selection (phenotypic assortment) was not  
298 achieved, indicating that Mlp1 is likely essential in this system, similar to *Mus musculus*,  
299 *Drosophila melanogaster*, *Trypanosoma brucei* and *Arabidopsis thaliana*<sup>25-28</sup>. We  
300 extracted total RNA followed by pre-tRNA intermediate detection by Northern blot for  
301 pre-tRNA Ile<sup>UAU</sup>, Leu<sup>UAA</sup> and Val<sup>AAC</sup>. We found that in absence of Mlp1, a 3'-trailer  
302 containing pre-tRNA intermediate was stabilized (**Figure 5B** – intron probe, bottom  
303 band). These data provide evidence for *Tetrahymena* being the first eukaryote in which  
304 La protein levels correlate inversely with 3'-trailer stabilization. These results are also  
305 consistent with our heterologous expression data in *Schizosaccharomyces pombe*  
306 indicating impaired protection of pre-tRNA 3'-trailers by Mlp1. These data suggest that  
307 the variant domain architecture of Mlp1 relative to other genuine La proteins is  
308 associated with an altered pre-tRNA processing pathway in this system.

309 To study the effect of Mlp1 depletion on a transcriptome-wide scale, we performed total  
310 RNA-sequencing of small RNA-enriched samples, similar to our Mlp1 RIP-Seq (see  
311 **Figure 2B**), in which counts for each pre-tRNA isoacceptor were determined for each  
312 unique uridylate tail length at the 3'-end of the tRNA. We found that the average length  
313 of the 3'-uridylate tail increased for the majority of tRNA species as a result of Mlp1  
314 depletion (**Figure 5C,D**). These findings indicate that Mlp1 promotes removal of the 3'-

315 trailer and that when Mlp1 is limiting, the 3'-trailer sequences are not processed as  
316 efficiently. Together, these data are consistent with Mlp1 accelerating 3'-end  
317 processing, relative to other examined species in which genuine La proteins stabilize 3'-  
318 trailers.

319 Previous work has demonstrated that in eukaryotes, the number of genomic tRNA gene  
320 copies correlates strongly with the expression of mature tRNA transcripts and thus can  
321 function as a predictor for tRNA expression levels<sup>29,30</sup>. We observed that in  
322 *Tetrahymena* the number of genomic tRNA genes correlates with the expression levels  
323 of tRNAs ( $R^2 = 0.55$ ,  $r = 0.75$ ) (**Figure 5E**). To investigate if depletion of Mlp1 results in  
324 changes of total tRNA levels, we performed the same analysis for our Mlp1 partial  
325 knockout strain ( $R^2 = 0.53$ ,  $r = 0.73$ ) (**Figure 5F**) and found that when comparing tRNA  
326 expression between WT and partial KO strains the correlation was almost perfect ( $R^2 =$   
327  $0.94$ ,  $r = 0.97$ ) (**Figure 5G**), indicating that Mlp1 depletion did not influence mature tRNA  
328 expression. Northern blot analysis for representative tRNAs confirmed equal amounts of  
329 mature tRNA between WT and partial KO strains (**Figure 5H**).

330

### 331 **The 3'-trailer lengths are shorter in *Tetrahymena thermophila* compared to other** 332 **examined eukaryotes**

333 To explore tRNAs and pre-tRNA processing in *Tetrahymena* more extensively, we  
334 compared their predicted pre-tRNA architecture to those from other eukaryotic species.  
335 First, we compared 3'-trailer lengths of each pre-tRNA, as determined by the number of  
336 nucleotides between the discriminator base and the genomic stretch of at least four

337 consecutive thymines<sup>31</sup> that give rise to the 3'UUU-OH motif in the nascent transcript.  
338 We found that *Tetrahymena* has shorter 3'-trailer lengths than any other species  
339 analyzed, with the most common 3'-trailer length being zero nucleotides (**Figure 6A,**  
340 **Table 2**). A similar analysis for the total length of the mature tRNA revealed that, as  
341 expected, the average length of mature tRNAs is the same as other examined species  
342 (**Figure 6B, Table 2**). We previously noted differences in enrichment of pre-tRNAs  
343 isotypes (**Figure S2B** – pre-tRNAs) in our Mlp1 RIP-seq results and hypothesized that  
344 the 3'-trailer length could be a determinant for binding affinity. We plotted fold  
345 enrichment for pre-tRNAs between Mlp1-immunoprecipitated and input tRNAs against  
346 3'-trailer length and found that these are moderately negatively correlated ( $R^2 = 0.14$ ,  $r$   
347  $= -0.38$ ) (**Figure S7A**), suggesting that nascent pre-tRNAs containing a longer 3'-trailer  
348 sequence may have a slightly lower binding affinity for Mlp1. When comparing this to  
349 the hLa data, we found a lesser correlation ( $R^2 = 0.05$ ,  $r = -0.22$ ) (**Figure S7B**).

350 Processing of the 5'-leader by RNase P is based on tertiary structure recognition of the  
351 tRNA followed by endonucleolytic cleavage at the  $-1/+1$  position<sup>32,33</sup>. Previous studies  
352 demonstrated structural conservation of the catalytically active RNA in RNase P in  
353 *Tetrahymena*, indicating that processing occurs in a similar manner<sup>33,34</sup>. Optimal  
354 efficiency of RNase P cleavage is dependent on the presence of a bulge that includes  
355 the last nucleotide of the 5'-leader (the  $N_{-1}$  position; **Figure 6C**), as extensive base  
356 pairing between 5'-leader and 3'-trailer sequences inhibits 5'-leader cleavage<sup>35</sup>. We  
357 hypothesized that *Tetrahymena* tRNAs should have adapted 5'-leader sequences to  
358 ensure the generation of a mismatched bulge against the shorter 3'-trailer sequences.  
359 We determined the most common 5'-leader sequences by logo generation for



360 *Tetrahymena thermophila*, *Schizosaccharomyces pombe* and *Homo sapiens* and found  
361 that the most frequent nucleotide at the most 3'-residue of the 5'-leader sequence ( $N_{-1}$ )  
362 in *Tetrahymena* is an adenine ( $\pm 75\%$ ) (**Figure 6D**, **Figure S7C**). In contrast, the  
363 distribution of nucleotides at this position is more diverse in other species (**Figure 6D**,  
364 **Figure S7C**). At the 3'-end of the mature transcript, the discriminator base ( $N_{73}$ ) is  
365 mostly adenine ( $\pm 50\%$ ), followed by guanine as second most frequent nucleotide ( $\pm$   
366 25%) (**Figure S7D**) which is common for all eukaryotes in this study.

367 We then split our data based on the identity of the discriminator base ( $N_{73}$ ) (**Figure 6E**,  
368 **Figure S7E**), which can pair with the first nucleotide in the 5'-leader ( $N_{-1}$ ). We observed  
369 a strong lack of Watson–Crick base pairing for *Tetrahymena* between the opposing  
370 nucleotides in the discriminator base pairing with the typical adenine ( $A_{73} - A_{-1}$ ;  $C_{73} - A_{-1}$   
371 and  $G_{73} - A_{-1}$ ). Conversely, tRNAs containing a thymine as discriminator base ( $T_{73}$ )  
372 strongly avoided an adenine as the  $N_{-1}$  5'-leader base to avoid base pairing. This  
373 partitioned discrimination is not evident for *Schizosaccharomyces pombe* and *Homo*  
374 *sapiens* (**Figure 6E**). Since shortened 3'-trailers in *Tetrahymena* should have a greater  
375 dependence on leader-trailer bulges occurring through the discriminator base, these  
376 data are thus consistent with the 3' most nucleotide of the 5'-leader having a greater  
377 evolutionary pressure to avoid base pairing with the discriminator base which is seen  
378 most strongly for *Tetrahymena* (**Figure S7F**) relative to other examined species.

379

## 380 Discussion

381 Previously studied genuine La proteins contain a conserved tandem arrangement of a  
382 LaM and RRM1 collectively referred to as a La module. Previous phylogenetic  
383 predictions<sup>12</sup> and our continued computational analysis have indicated that the  
384 previously characterized *Tetrahymena* protein Mlp1 may group with the genuine La  
385 proteins, despite the predicted lack of the La module's RRM1 domain. In addition to the  
386 absence of the RRM1, Mlp1 is predicted to have a previously uncharacterized domain  
387 of unknown function (DUF3223), which is absent in all other examined members of the  
388 LARP superfamily. Since this arrangement of a genuine La protein is unprecedented, it  
389 was not clear how this protein might perform La associated functions and what effects  
390 this might have, if any, on the processing of La RNA targets.

391 In this work we present data consistent with Mlp1 functioning as a genuine La protein.  
392 Using *in vitro* binding assays, we demonstrate that the identity of the Mlp1 residues Q11  
393 and Y14, analogous to UUU-3'OH binding residues in hLa, are also required for high  
394 affinity binding of 3'-uridylylate containing trailer sequences. We demonstrate that binding  
395 of uridylylate RNA is retained when both the predicted LaM (Mlp1 1-95) and middle  
396 domain (Mlp1 95-250) are included, however, uridylylate binding does not occur when  
397 either the LaM (Mlp1 1-95) or the middle domain (Mlp1 95-250) are tested in isolation.  
398 Given the relative paucity of contacts from the RRM relative to the LaM during hLa  
399 binding to UUU-3'OH, it seems likely that the 95-250 region might serve an analogous  
400 function, making contacts important for UUU-3'OH binding despite the absence of the  
401 RRM fold.

402 While the Mlp1 LaM and middle domain combine to support UUU-3'OH binding similar  
403 to the classic La module, other key differences exist. Using competition experiments, we

404 found that short UUU-3'OH containing trailers were more easily displaced from Mlp1 by  
405 pre-tRNA and mature tRNA substrates, relative to hLa, suggesting that Mlp1 binding to  
406 UUU-3'OH may be less stable compared to La proteins with the classic LaM-RRM1  
407 arrangement. The previous hLa-UUU-3'OH co-crystals revealed that RRM1 only makes  
408 a single contact with the penultimate uridylate RNA (U<sub>2</sub>) during UUU-3'OH binding, and  
409 it is this uridylate that is recognized with the greatest specificity. Unlike hLa, the U<sub>2</sub>C  
410 RNA was no less effective a competitor against the 4U RNA than the U<sub>3</sub>C and U<sub>1</sub>C  
411 RNAs when Mlp1 was tested. The impaired ability of Mlp1 to discriminate the U<sub>2</sub>  
412 residue, as well as uridylates more generally, suggest that the lack of the RRM1 results  
413 in a relatively lower ability of Mlp1 to differentiate UUU-3'OH containing RNAs.

414 Previous work has demonstrated that the La module (LaM+RRM1) of different LARPs,  
415 and more specifically their RRM regions, possess RNA chaperone activity in the  
416 absence of 3'-uridylate protection from exonucleases<sup>20,21</sup>. Using tRNA-mediated  
417 suppression in a La null strain (*sla1-*) of *Schizosaccharomyces pombe*, we  
418 demonstrated that while the uridylate binding residues in the LaM of Mlp1 are important  
419 for suppression, the DUF3223 region also promotes the correct folding of defective pre-  
420 tRNAs. These data raise the possibility that the DUF3223 region of Mlp1 may serve an  
421 analogous function in RNA chaperone activity previously associated with the RRM1 and  
422 other C-terminal regions of genuine La proteins.

423 However, genuine La proteins are well known to also stabilize 3'-trailer containing  
424 intermediates through high-affinity binding of the 3'-uridylate tail and thereby providing  
425 protection against 3'-exonucleases. Using Northern blotting and RIP-3'-RACE, we  
426 demonstrated that while *Schizosaccharomyces pombe* La stabilizes 5'-leader, 3'-trailer,

427 and intron-containing pre-tRNA intermediates, Mlp1 stabilized a 5'-leader and intron  
428 containing, but 3'-trailer lacking, pre-tRNA species, suggesting that Mlp1 may  
429 accelerate 3'-processing of nascent pre-tRNAs, relative to other La proteins. This could  
430 imply that binding of Mlp1 to the 3'-ends of the nascent pre-tRNAs is not as strong as  
431 compared to Sla1p, leaving the RNA exposed to 3'-exonucleases. Alternatively, Mlp1  
432 could increase access of the 3'-trailer to the endonuclease RNase Z.

433 To better understand how the altered architecture of Mlp1 might influence pre-tRNA  
434 processing, we generated a partial *MLP1* knockout strain in *Tetrahymena* and  
435 performed RNA-Seq and Northern blots of endogenous tRNA species. We found that,  
436 consistent with our Mlp1 data from *Schizosaccharomyces pombe*, Mlp1 appears to  
437 promote the removal of 3'-trailers, as depletion of Mlp1 *in vivo* leads to a greater relative  
438 abundance of UUU-3'OH trailer extensions. In yeast, depletion of La leads to  
439 exonucleolytic nibbling and a lower abundance of UUU-3'OH ends, while in the  
440 presence of La the 3'-end is stabilized until endonucleolytic cleavage by RNase Z  
441 directly 3' to the discriminator base (N<sub>73</sub>) (**Figure 7**).

442 Previous work has demonstrated that hLa impedes access by RNase Z, delaying the 3'-  
443 endonucleolytic and resulting in 5'-leader processing proceeding 3'-trailer processing<sup>36</sup>.  
444 We hypothesize that the presence of an RRM1 in hLa could be contributing to this  
445 function, seeing that in Mlp1, a La protein lacking the RRM1, the 3'-processing appears  
446 to not be blocked. Thus, the apparent destabilization of 3'-trailers by Mlp1 in  
447 *Tetrahymena* suggests that the function of La in this system, differing from other  
448 examined La proteins, may be to increase access of the pre-tRNA 3'-trailer to the tRNA  
449 processing machinery (**Figure 7**). The difference in processing of pre-tRNAs is likely

450 caused by Mlp1 since the 3'-exonuclease Rex1p and 3'-endonuclease RNase Z are  
451 conserved in *Tetrahymena* (**Figure S8A,B**). An alternate but not mutually exclusive  
452 hypothesis may be that reduction of Mlp1 levels may alter access of pre-tRNA 3'-ends  
453 to the Lsm2-8 complex, and that this may be linked to 3'-trailer accumulation relative to  
454 wild-type cells, as previous work in yeast has also linked the Lsm2-8 complex to the  
455 processing of pre-tRNA 3'-ends<sup>37,38</sup>. To confirm that the Lsm2-8 complex functions  
456 similar as in other eukaryotic systems, we compared primary amino acid sequence  
457 alignments and found that the LSm2-8 complex in *Tetrahymena* appears to be  
458 conserved in *Tetrahymena*, indicating similar functionality (**Figure S8C,D**). We also  
459 observed that Mlp1 depletion did not lead to changes in mature tRNA expression levels,  
460 suggesting that an Mlp1-independent tRNA maturation pathway also likely exists in  
461 *Tetrahymena*, similar to budding and fission yeast.

462 Along with the alternate Mlp1-associated tRNA processing in *Tetrahymena*, we  
463 observed several differences in features of pre-tRNA 5'-leaders and 3'-trailers  
464 compared to other eukaryotic species. Our genome-wide 3'-trailer length analysis in  
465 eukaryotes revealed that *Tetrahymena* pre-tRNAs have very short 3'-trailer sequences.  
466 Since 3'-trailers in *Tetrahymena* are dominated by the uridylate stretch, we studied the  
467 prevalence of the 3'-most terminal residue of the 5'-leader (N<sub>1</sub>) and found that  
468 *Tetrahymena* pre-tRNAs appear to have evolved to avoid perfect matches with the  
469 discriminator base (N<sub>73</sub>) (preceding the uridylate tail), ensuring a lack of complete base  
470 pairing to enhance RNase P cleavage in the context of a minimized 3'-trailer sequence.  
471 Further upstream in the 5'-leader (N<sub>2</sub>) is often an adenosine, but then typically  
472 uridylates, which would not be expected to pair with the 3'UUU-OH motif. Thus, 5'-

473 leaders and 3'-trailers in *Tetrahymena* may have evolved to have minimal base pairing  
474 between pre-tRNA 5'-leaders and 3'-trailers, compared to other eukaryotes in which a  
475 bulge proximal to the mature tRNA ends is often followed by a paired region closer to  
476 the 5'-leader and 3'-trailer extremities. For example, human pre-tRNAs have an  
477 approximately equal distribution of N<sub>-1</sub> nucleotide for discriminator bases A, T and G.  
478 The most prevalent N<sub>-1</sub> nucleotide for discriminator bases A and T, are T and A  
479 respectively, indicating that human pre-tRNAs, which generally contain a longer 3'-  
480 trailer sequence, have more flexibility in N<sub>-1</sub> sequence to introduce a mismatch bulge at  
481 the N<sub>-1</sub> site for optimal 5'-leader processing by RNase P. It will be interesting to further  
482 investigate whether this alternate arrangement is linked to the altered functional roles  
483 described here for Mlp1 in this system.

484

## 485 **Materials and Methods**

### 486 Conservation analysis

487 Accession numbers used to obtain primary amino acid sequences from the National  
488 Center for Biotechnology Information (NCBI) for La, Rex1p, RNase Z/ELAC 2 and  
489 LSm2-8 complex are shown in **Table S6** and primary amino acid alignments were  
490 obtained using Clustal Omega (EMBL-EBI)<sup>39</sup>, followed by analysis using a custom  
491 python script to annotate identical and conserved amino acids using human protein  
492 sequences as a reference. Amino acids were grouped as conserved based on side  
493 chain diversity: (1) Asp (D), Glu (E), Asn (N), Gln (Q); (2) Lys (K), Arg (R), His (H); (3)  
494 Phe (F), Trp (W), Tyr (Y); (4) Val (V), Ile (I), Leu (L), Met (M); and (5) Ser (S), Thr (T).

495 Secondary structure predictions were obtained using Phyre2<sup>40</sup> and color coded based  
496 on predicted  $\beta$ -sheet or  $\alpha$ -helices. High-resolution structures of the LaM of *Homo*  
497 *sapiens*, *Trypanosoma brucei*, and *Dictyostelium discoideum* La proteins were obtained  
498 from PDB: 2VOD, 1S29, and 2M5W, respectively. Structure of the La module  
499 (LaM+RRM1) in complex with uridylylate RNA of *Homo sapiens* La was obtained from  
500 PDB: 2VOD. Structure prediction of the LaM of *Tetrahymena thermophila* was obtained  
501 using the Iomets2 tool<sup>41</sup>. Structure of the LSm2-8 complex in complex with uridylylate  
502 RNA of *Schizosaccharomyces pombe* and *Saccharomyces cerevisiae* were obtained  
503 from PDB: 6PNN and 4M7D, respectively. Modeling was done using PyMOL.

504

#### 505 DNA constructs

506 The *MLP1* coding sequence encoding *Tetrahymena thermophila* La protein (NCBI  
507 Reference Sequence: XP\_001019287.2) was obtained from the *Tetrahymena* Genome  
508 Database <http://www.ciliate.org/><sup>42</sup>, and codon optimized for expression in *E. coli*.  
509 gBlocks of the optimized codon sequence were ordered from integrated DNA  
510 technologies (IDT) (sequence can be found in **Table S5**).

511 Mlp1 and Mlp1 mutants used for *in vitro* electromobility shift assays (EMSAs) were  
512 cloned in the *NheI* and *BamHI* restriction enzyme sites of the pET28a vector using the  
513 plasmid encoded N-terminal 6XHis-tag for protein purification. pET28a hLa was  
514 previously cloned in the *NcoI* and *BamHI* sites including a reverse primer-encoded 6X-  
515 His tag. Mlp1 and Mlp1 mutants used for *Schizosaccharomyces pombe* transformations  
516 were cloned in the *Sall* and *BamHI* sites in pRep4 plasmid (ura+) incorporating a 6X-His

517 tag N-terminally in the forward primer during PCR amplification. All primers are listed in  
518 **Table S5**.

519 T7 DNA templates for *in vitro* transcription were generated by PCR amplification using  
520 pre- or mature tRNA specific primers (listed in **Table S5**) to obtain DNA templates  
521 containing an upstream T7 promoter. The DNA template was gel purified using 7 M  
522 urea denaturing 10% polyacrylamide gel and DNA was eluted from the gel by overnight  
523 rotation in 150 mM sodium acetate, in 50% phenol:chloroform:isoamylalcohol at 4°C.  
524 The aqueous layer obtained by centrifugation at 20,000 g for 10 minutes at 4°C was  
525 ethanol precipitated overnight at -80°C.

526

#### 527 *Tetrahymena thermophila* cultivation and knockout strain generation

528 Liquid cultures were grown to mid-log phase ( $0.1 - 1 \times 10^6$  cells/mL) at 30°C shaking at  
529 90 RPM in SPP media (1% proteose peptone, 0.1% yeast extract, 0.2% glucose,  
530 0.003% Fe-EDTA)<sup>43</sup>. Cell pellets were harvested by centrifugation for 3 minutes at  
531 1000g. Following two washes in 10 mM Tris-HCl, pH 7.4, pellets were stored at -80°C.

532 PCR-amplification from *Tetrahymena thermophila* genomic DNA to obtain flanking 5'-  
533 and 3'-regions was completed using primers containing *KpnI/XhoI* and *NotI/SacI*,  
534 respectively. The flanking regions of the *MLP1* gene (<http://www.ciliate.org/> -  
535 THERM\_00384860) were cloned into pNeo4 plasmid<sup>44</sup> flanking the paromomycin  
536 (Neo4) drug resistance cassette using restriction enzyme sites *KpnI XhoI* and *SacI NotI*,  
537 respectively. The Neo4 cassette is located downstream of the CdCl<sub>2</sub> inducible  
538 metallothionein (MTT1) promoter. The resulting pNeo4 *MLP1* knockout plasmid DNA



539 construct was linearized using the *ScaI* restriction enzyme prior to transformation.  
540 Biolistic transformation of *Tetrahymena thermophila* was performed as described  
541 previously<sup>45</sup>. Integration of the DNA construct is based on homologous recombination  
542 and transformants were grown under increasing concentration of paromomycin starting  
543 at 60 µg/mL to a final concentration of 1000 µg/mL (phenotypic assortment)<sup>46</sup>. Correct  
544 integration was determined using Southern blot and PCR.

545

#### 546 Protein isolation from *Tetrahymena thermophila*

547 *Tetrahymena thermophila* cell pellets were resuspended in 10% Trichloroacetic acid  
548 (TCA) in PBS, followed by incubation at -20°C overnight to enhance protein  
549 precipitation. The white fluffy protein pellet was collected by centrifugation for 15  
550 minutes at 10,000g at 4°C, then washed twice with 100% ice-cold acetone. The pellet  
551 was air-dried and resuspended in 50µL/mL culture 2.5X SDS loading dye [5X SDS  
552 loading dye: 5% β-mercaptoethanol (v/v), 0.02% bromophenol blue (w/v), 30% glycerol  
553 (v/v), 10% sodium dodecyl sulfate (SDS) (w/v), 250 mM Tris-HCl, pH 6.8].

554

#### 555 RNA-immunoprecipitation from *Tetrahymena thermophila*

556 *Tetrahymena thermophila* cell pellets from 100 mL cultures were collected at log phase  
557 ( $0.1 - 1 \times 10^6$  cells/mL) and washed twice with 1X PBS. The cells were cross-linked with  
558 1% formaldehyde for 10 minutes followed by quenching with 0.25 M glycine for 5  
559 minutes at room temperature. Cells were washed twice in 1X PBS before lysis in 2 mL  
560 buffer A [30 mM Tris-HCl pH 7.4, 150 mM NaCl, 20 mM KCl, 2 mM MgCl<sub>2</sub>, 0.1% Triton-

561 X100, 1 mM phenylmethylsulfonyl fluoride (PMSF), 1X Halt Protease Inhibitor Cocktail  
562 (PIC) (ThermoFisher Scientific), 100U SUPERase In RNase Inhibitor (ThermoFisher  
563 Scientific)] followed by sonication (25% amplification with 15s intervals for 4 minutes).  
564 The lysate was clarified by centrifugation at 20,000 g for 45 minutes at 4°C and treated  
565 with 10 U TurboDNase. The lysates were pre-cleared using rabbit isotype immunoglobulin  
566 G (IgG) control-bound Protein G Dynabeads rotating for 1 hour at 4°C.  
567 Immunoprecipitations were performed using an affinity purified rabbit anti-Mlp1 antibody  
568 (ThermoFisher Scientific – Custom Antibodies) and a rabbit IgG control coupled to  
569 Protein G Dynabeads rotating 1 hour at 4°C. The Protein G Dynabeads were washed 5  
570 times using buffer A (without PIC, PMSF and RNase inhibitor). Input and eluted RNA  
571 was isolated following reverse cross-linking for 45 minutes at 70°C in buffer B [50 mM  
572 Tris-HCl pH 7.4, 5 mM EDTA pH 8.0, 10 mM DTT, 1% SDS], followed by Trizol  
573 extraction.

574

#### 575 tRNA library preparation and TGIRT sequencing and analysis

576 Total and Mlp1-associated RNAs were size-selected (20-300 nucleotides) on a 7 M  
577 urea denaturing 10% polyacrylamide gel. RNA was eluted from the gel by overnight  
578 rotation in 150 mM sodium acetate, pH 5.1 in 50% phenol:chloroform:isoamylalcohol at  
579 4°C. The aqueous layer obtained by centrifugation at 20,000g for 10 minutes at 4°C was  
580 ethanol precipitated overnight at -80°C. The cell pellet was washed once with 70%  
581 ethanol, air dried and resuspended in RNase-free H<sub>2</sub>O. To promote sequencing of  
582 highly structured tRNA species carrying modifications that are inhibitory to cDNA  
583 synthesis, we used TGIRT-III reverse transcriptase (InGex) template-switching to

584 prepare cDNA libraries as described previously<sup>47,48</sup>. Libraries were sequenced on a  
585 NextSeq500 platform (Illumina) (2x 75 bp).

586

### 587 tRNA-Seq processing pipeline

588 Details about tools and parameters of bioinformatics analyses are regrouped in a  
589 reproducible Snakemake workflow that can be found at  
590 [https://github.com/etiennefc/t\\_thermophila\\_RNA\\_Seq.git](https://github.com/etiennefc/t_thermophila_RNA_Seq.git) and are also described below.

591 The raw data (.fastq files) are available for download on the Gene Expression Omnibus  
592 (GEO) under the accession number XXX. Briefly, paired-end reads were trimmed using  
593 Trimmomatic v0.36<sup>49</sup>, and FastQC v0.11.5 was used to evaluate read quality before and  
594 after trimming, as described previously<sup>47</sup>. Resulting trimmed reads were then aligned  
595 stringently (*i.e.* allowing no mismatch) to the *Tetrahymena thermophila* genome  
596 assembly version T\_Thermophila\_MAC\_2021<sup>50</sup> (accessible on the Tetrahymena  
597 Genome Database at [http://www.ciliate.org/system/downloads/1-upd-Genome-  
598 assembly.fasta](http://www.ciliate.org/system/downloads/1-upd-Genome-assembly.fasta)) using STAR v2.6.1a<sup>51</sup> (with the parameters described previously<sup>47</sup> and  
599 also the following parameter and value: --outFilterMismatchNmax 0. The index needed  
600 to align reads to the genome was produced using STAR v2.6.1a as described  
601 previously<sup>47</sup> using the genome assembly described previously and a custom  
602 *Tetrahymena thermophila* annotation (.gtf) file available at  
603 <https://zenodo.org/record/6391187#.YkH9v-fMK3A>. The annotation file was built by  
604 converting .gff files (one for protein-coding genes, one for tRNA genes and one for 5S  
605 ribosomal RNA genes; these .gff files are also available at  
606 <https://zenodo.org/record/6391187#.YkH9v-fMK3A>) into .gtf files and by concatenating

607 these files into one final (.gtf) annotation file using custom bash scripts. This annotation  
608 was corrected for embedded genes using CoCo v0.2.5.p1<sup>52</sup> with the correct\_annotation  
609 mode and default parameters. Counts were attributed to genes and normalized as  
610 transcripts per million (TPM) as previously described<sup>47</sup> using CoCo v0.2.5.p1 with the  
611 correct\_count mode. Bedgraph files were generated using again CoCo v0.2.5.p1 (with  
612 the correct\_bedgraph mode with default parameters). Differential expression analysis  
613 was performed using DESeq2<sup>53</sup> with default parameters and the count output of CoCo  
614 correct\_count to compare the WT, Mlp1 IP and Mlp1 partial Mlp1 KO samples.  
615 Normalized counts measured in TPM and differential expression data for tRNAs are  
616 shown in **Additional Table 1**.

617

#### 618 tRNA read fishing and binning into pre-mature and mature tRNAs

619 Raw counts for pre-tRNA (3'-UUU) and mature tRNAs (3'-CCA) were generated using  
620 custom python scripts. A list of unique sequences was generated for each tRNA  
621 isoacceptor (e.g. Gln TTG: AATCCTCTGACCTGGGTTCTGAATCCCAGTACGACCT)  
622 (**Additional Table 2**) and used to obtain (“fish”) all reads from the unmapped raw  
623 sequence files (.fastq file format). Each sequence was grouped in corresponding bins  
624 based on the 3'-end of the reads: -CCA (mature tRNA), 1U, 2U, 3U, 4U, 5U, 6U, 7U,  
625 8U, 9U or 10U (premature tRNA). Raw counts for each tRNA isotype were normalized  
626 as counts per million (CPM) by dividing raw counts by the total number of fished read  
627 per bin for each replicate divided by 10<sup>6</sup> (**Table S2 and Table S3**). Fold-enrichment for  
628 Mlp1-bound tRNAs was calculated after summation of pre-tRNA counts, followed by  
629 taking the ratio of CPM data for Mlp1-immunoprecipitated tRNAs and WT input tRNAs

630 and displayed after log<sub>2</sub> transformation in heatmaps (**Table S2**). Fold-enrichment for  
631 hLa-bound tRNAs from <sup>18</sup> was obtained from the GEO database under accession  
632 number GSE95683 where counts for pre-tRNAs and mature tRNAs were normalized as  
633 CPM and transformed identically as Mlp1-bound tRNAs. The cumulative abundance in  
634 CPM for each pre-tRNA isoacceptor was calculated for WT and partial KO tRNAs and  
635 displayed after log<sub>10</sub> transformation in heatmaps (**Table S3**).

636

### 637 Electromobility shift assays (EMSA)

638 U10 and CUGCUGUUUU (20 pmol) were chemically synthesized (Integrated DNA  
639 Technologies (IDT)) and 20 pmol RNA was radioactively labeled using [ $\gamma$ -<sup>32</sup>P]-ATP  
640 (PerkinElmer, 10mCi/ml) and 10 units T4 Polynucleotide Kinase (PNK) enzyme (New  
641 England Biolabs, cat#M0201S) for 2 hours at 37°C in 1X T4 PNK buffer (New England  
642 Biolabs, cat#B0201S). Radioactively labeled tRNAs were produced by T7 *in vitro*  
643 transcription in the presence of [ $\alpha$ -<sup>32</sup>P]-UTP (PerkinElmer, 10mCi/ml) using PCR  
644 products containing an upstream T7 promotor (see DNA constructs). Dephosphorylation  
645 of the 5'-triphosphate pre-tRNA was done using 5 units QuickCIP (New England  
646 Biolabs, cat#M0525S) for 30 minutes at 37°C in 1X rCutSmart Buffer (New England  
647 Biolabs, cat# B6004S), followed by Trizol extraction. All radioactively labeled RNAs  
648 were PAGE purified and eluted in 0.5M NaCl overnight at room temperature.

649 His-tagged proteins hLa, Mlp1 and Mlp1 mutants were purified from *Escherichia coli*  
650 BL21 cells using Co<sup>2+</sup> beads, followed by heparin column purification. The proteins were

651 buffer exchanged in 1X PBS and quantified using Bovine Serum Albumin (BSA)  
652 quantifications on SDS-PAGE gels.

653 EMSAs were performed as described<sup>54</sup>. Briefly, 3000 CPM of radioactive RNA  
654 substrates (~ 0.1 nM) were incubated in 1X EMSA buffer [10% glycerol, 20 mM Tris-  
655 HCl, pH 7.4, 100 mM KCl, 1 mM EDTA, 5 mM  $\beta$ -mercaptoethanol and bromophenol  
656 blue] at 95°C for 5 minutes, followed by slow cooling to room temperature. For  
657 competition EMSAs, unlabelled RNA was added to the radioactively labeled RNA prior  
658 to incubation at 95°C. The concentration of unlabelled RNA depends on the protein  
659 concentration used to bind >85% of the radioactively labeled RNA. Protein was added  
660 and incubated for 30 minutes at 30°C. Then, the protein-RNA complexes were  
661 immediately snap cooled on ice for 5 minutes and separated on a 8% native  
662 polyacrylamide gel at 4°C at 100V. The gels were dried for 45 minutes at 80°C on a Gel  
663 Dryer (Bio-Rad) and exposed to a storage phosphor screen overnight. The screens  
664 were developed on a Typhoon. Quantification of bound and free RNA was done using  
665 ImageJ and binding curves were fit using a nonlinear specific binding curve fitting  
666 program and Kd values were calculated (GraphPad Prism).

667

#### 668 tRNA mediated suppression assay in *Schizosaccharomyces pombe*

669 tRNA mediated suppression assays were performed as described previously<sup>22</sup>. In brief,  
670 the *sla1-* *Schizosaccharomyces pombe* ySH9 strain encoding a defective UGA-  
671 decoding suppressor tRNA (tRNA-Ser<sup>UCA</sup>) and the *ade6-704* allele was transformed  
672 using a pRep4 plasmid encoding Sla1p, Mlp1 and multiple Mlp1 mutants. Following

673 transformation of *Schizosaccharomyces pombe* suppressor strains using pRep4  
674 plasmid (*ura4+*), strains were grown on selective media (Edinburgh Minimal Medium  
675 (EMM) –*ura* –*leu*) and grown in liquid EMM –*ura* – *leu* to mid-log phase (OD 0.6-0.9).  
676 Spotting was done by transferring 4  $\mu$ L of liquid culture on low adenine-containing plates  
677 (EMM –*ura* –*leu* *ade10*), followed by a 4-day incubation at 32°C. Yeast pellets for  
678 protein purification or RNA extraction were obtained by centrifugation of mid-log phase  
679 cells at 1800 g for 10 minutes following by two washes with ddH<sub>2</sub>O.

680 Protein extraction was done by resuspension of cell pellets in NET-2 buffer [50 mM Tris-  
681 HCl, pH 7.4, 150 mM NaCl, 0.05% NP40, 1 mM PMSF and 1X PIC], followed by lysis  
682 through bead-beating for 2 minutes total (20 sec ON – 20 sec OFF intervals) at 4°C.  
683 Cell lysates for protein analysis were obtained following centrifugation for 15 minutes at  
684 20,000 g.

685 RNA extraction was completed by resuspending the cell pellets in complete RNA  
686 extraction buffer A [50 mM NaOAc, pH 5.1, 10 mM EDTA, 1% SDS], followed by adding  
687 37°C buffer A [50 mM NaOAc, pH 5.1]-saturated acid phenol and incubation at 65°C for  
688 4 minutes with frequent vortexing. The aqueous top layer was extracted following  
689 centrifugation for 3 minutes at 20,000 g and extracted again using  
690 phenol:chloroform:isoamyl alcohol (25:24:1). RNA was precipitated from the aqueous  
691 layer by ethanol precipitation and incubation at -80°C for at least 1 hour.

692

693 RNA-immunoprecipitation and 3'RACE in *Schizosaccharomyces pombe*

694 Sla1p- and Mlp1-transformed *Schizosaccharomyces pombe* sla1- strains (ySH9) were  
695 grown to mid-log phase (OD 0.6-0.9) in EMM –ura –leu. The culture was cross-linked at  
696 200 RPM in 0.5% formaldehyde at room temperature for 20 minutes, followed by adding  
697 200 mM glycine for 10 minutes. The yeast pellet was collected by centrifugation for 10  
698 minutes at 4000 RPM (Beckman Coulter JLA9.1000 rotor), washed with ddH<sub>2</sub>O and  
699 collected by centrifugation for 10 minutes at 1800g, followed by one wash in  
700 resuspension buffer [1.2% polyvinylpyrrolidone (PVP), 20 mM HEPES, pH 7.4, 1 mM  
701 PMSF, 1X PIC, 1 mM DTT]. The yeast pellet was flash frozen in liquid nitrogen as a  
702 continuous bead, followed by cryogrinding in liquid nitrogen using a mortar and pestle.  
703 Yeast powder was lysed in RNP buffer [20 mM HEPES, pH 7.4, 110 mM KOAc, 100  
704 mM NaCl, 0.5% Triton-X100, 0.1% Tween-20, 1 mM PMSF, 1X PIC and 0.05 U/μL  
705 RNase inhibitor]. The lysate was clarified by centrifugation at 20,000g for 10 minutes at  
706 4°C. Next, 0.005 U/μL TurboDNase (ThermoFisher Scientific AM2238) was added, and  
707 the cell lysate was pre-cleared using Protein G Dynabeads coated with rabbit isotype  
708 immunoglobulin G (IgG) control rotating 1 hour at 4°C. Immunoprecipitations were  
709 performed using an affinity purified rabbit anti-Mlp1 and anti-Sla1p antibody  
710 (ThermoFisher Scientific – Custom Antibodies) coated to Protein G Dynabeads rotating  
711 1 hour at 4°C. As a control, the same antibodies were used for immunoprecipitations  
712 from ySH9 transformed with empty pRep4 plasmid. The Protein G Dynabeads were  
713 washed 5 times using RNP buffer (without PIC, PMSF and RNase inhibitor). RNA was  
714 isolated following reverse cross-linking for 45 minutes at 70°C in buffer B [50 mM Tris-  
715 HCl pH 7.4, 5 mM EDTA pH 8.0, 10 mM DTT, 1% SDS], followed by Trizol extraction.



716 RNA samples were polyadenylated and reverse transcribed into cDNA using qScript®  
717 microRNA cDNA Synthesis Kit (QuantaBio). Using a pre-tRNA intron-specific forward  
718 primer (see **Table S5**), the substrate of interest was PCR-amplified using Taq DNA  
719 polymerase in combination with the reverse PerfeCTa Universal PCR Primer  
720 (QuantaBio) which anneals with the oligo-dT adapter sequence incorporated during  
721 cDNA synthesis. The PCR products were purified on a 1% agarose gel and ligated into  
722 a pGEM-T Easy Vector Systems (Promega) plasmid followed by transformation in *E.*  
723 *coli* cells. Plasmid DNA was extracted, and sequences determined by Sanger  
724 sequencing at the Hospital for Sick Children – The Centre for Applied Genomics  
725 (TCAG).

726

#### 727 tRNA 5'-leader and 3'-trailer computational analysis

728 A custom python script was used to scrape tRNA information for *Homo sapiens*, *Mus*  
729 *musculus*, *Drosophila melanogaster*, *Arabidopsis thaliana*, *Saccharomyces cerevisiae*  
730 and *Schizosaccharomyces pombe* from the Genomic tRNA Database (GtRNAdb)<sup>55</sup> and  
731 *Tetrahymena thermophila* sequences were obtained from the UCSC Genome Browser  
732 (<https://genome.ucsc.edu/>) (**Additional Table 3**). The number of tRNA genes encoded  
733 in the genome was determined for different eukaryotes for each isotype and isodecoder  
734 (**Table S4**). Trailer lengths were calculated as the number of nucleotides found between  
735 the discriminator base, the last annotated mature tRNA nucleotide, and a stretch of  
736 minimum four Ts in the genomic DNA. Trailer lengths longer than 20 nucleotides were  
737 excluded from the analysis. Mature tRNA sequence lengths were determined starting at  
738 nucleotide +1 and ending at discriminator base N73, excluding introns (official tRNA

739 numbering as described previously<sup>56</sup>). Statistical significance ( $P < 0.05$ ) was calculated  
740 using a one-way ANOVA and Tukey's multiple comparison test. The 5'-leader logo were  
741 generated for *Homo sapiens*, *S pombe* and *Tetrahymena thermophila* using WebLogo<sup>57</sup>  
742 and divided based on discriminator base identity.

743

#### 744 Immunofluorescent staining in *Tetrahymena thermophila*

745 *Tetrahymena thermophila* WT and partial Mlp1 KO strains were grown to mid-log phase  
746 and prepared for indirect immunofluorescent staining as described in<sup>58</sup>. Centrifugation  
747 steps including washes were performed for 3 minutes at 1000g. Briefly, fixative (two  
748 parts saturated HgCl<sub>2</sub> and one part 95% ethanol) was added to the cell suspension and  
749 incubated for 5 minutes at room temperature, followed by collecting and resuspending  
750 the cell pellet in 100% ice-cold methanol twice. The cell pellet was washed with PBS  
751 and incubated with primary rabbit anti-Mlp1 antibody (1:500 dilution) rotating overnight  
752 at 4°C. The cell pellet was washed three times with PBS, followed by incubation with  
753 secondary goat anti-rabbit IgG (1:10,000, ThermoFisher Scientific A11008) rotating for 1  
754 hour at room temperature. The cell pellet was washed three times with PBS. The cell  
755 suspension was dropped on a coverslip, airdried and mounted with Vectashield Antifade  
756 Mounting Medium with DAPI (Vector Laboratories) onto a microscope slide. Microscopy  
757 images were taken at 63x magnification on a LSM700 confocal laser scanning  
758 microscope (Zeiss) and processed in ZEN3.3 (blue edition).

759

#### 760 Northern blotting

761 RNA was obtained from storage solution at -80°C [100% ethanol slurry containing 150  
762 mM NaOAc, pH 5.1 and 30 µg GlycoBlue Coprecipitant (ThermoFisher Scientific  
763 AM9515)] by centrifugation at 20,000 g for 10 minutes. The RNA pellet was washed  
764 with 70% ethanol and airdried, followed by resuspension in RNase-free ddH<sub>2</sub>O.  
765 Samples were prepared by adding an equal volume of 2X formamide loading dye [80%  
766 deionized formamide, 0.06% (w/v) bromophenol blue, 0.06% (w/v) xylene cyanol, 10  
767 mM EDTA, pH 8.0], followed by incubation at 95°C for 5 minutes and snap cooling on  
768 ice. RNA samples were separated on a 7 M urea denaturing polyacrylamide gel at 4°C  
769 at 100V and transferred onto a charged nylon transfer membrane (PerkinElmer),  
770 followed by cross-linking using a UV Stratalinker and drying at 80°C on a Gel Dryer  
771 (Bio-Rad).

772 The membranes were hybridized for 2 h at the corresponding probe melting  
773 temperature (T<sub>m</sub>) -10°C in hybridization buffer [6X SSC (1X SSC: 150 mM NaCl and 15  
774 mM sodium citrate), 1% sodium dodecyl sulfate (SDS) and 4X Denhardt's solution (Bio  
775 Basic D0062)], followed by overnight incubation with T4 Polynucleotide Kinase (PNK)  
776 <sup>32</sup>P-labeled probes (see **Table S5**). Following three 20-minute washes in wash buffer  
777 [2X SSC and 0.1% SDS] the membrane was exposed to a storage phosphor screen  
778 overnight and developed on a Typhoon. To strip hybridized probe, the membrane was  
779 incubated three times with stripping buffer [0.1X SSC and 0.1% SDS] for 20 minutes  
780 each at 70°C.

781

782 Western blotting

783 Protein concentration was obtained using Bradford assays (ThermoFisher Scientific,  
784 cat#23300). Protein samples were incubated at 95°C for 10 minutes, separated by  
785 electrophoresis on a 12% SDS polyacrylamide gel and transferred onto a nitrocellulose  
786 membrane. The membrane was blocked in 0.5% (w/v) skim milk powder in Tris-  
787 Buffered Saline [20 mM Tris-HCl, 150 mM NaCl] + 0.1% Tween20 (TBST) for 1 hour at  
788 room temperature (or overnight at 4°C), followed by incubation with primary antibodies  
789 in TBST for 1 hour at room temperature (or overnight at 4°C). The membrane was  
790 washed 5 times with TBST, followed by incubation with HRP-conjugated secondary  
791 antibodies at 1:10,000 dilutions and incubated for 1 hour at room temperature. Primary  
792 antibodies used in this study: mouse anti-beta actin (abcam ab8224), rabbit anti-histone  
793 H3 (abcam ab1791) and affinity purified antibodies (ThermoFisher Scientific – Custom  
794 Antibodies) rabbit anti-Mlp1 and rabbit anti-Sla1p. Secondary HRP-coupled antibodies  
795 used in this study: goat anti-rabbit IgG (Cell Signaling Technology 7074) and horse anti-  
796 mouse IgG (Cell Signaling Technology 7076).

797

#### 798 Genomic DNA extraction and southern blotting in *Tetrahymena thermophila*

799 Genomic DNA extraction from *Tetrahymena thermophila* cell pellets was performed as  
800 described previously<sup>43</sup>. Briefly, cell pellets from 25 mL cultures were harvested and  
801 resuspended in 0.5 mL 10 mM Tris-HCl, pH 7.4, followed by addition of 3.5 mL urea  
802 buffer [42% (w/v) urea, 350 mM NaCl, 10 mM Tris, pH 7.4, 10 mM EDTA, 1% SDS, 0.1  
803 mg/mL Proteinase K] and incubated for 5 minutes at 50°C. DNA was extracted twice  
804 with an equal volume of phenol:chloroform:isoamylalcohol (25:24:1), followed by  
805 chloroform:isoamylalcohol (24:1) extraction. Next, one-third volume of 5 M NaCl was

806 added to the aqueous phase and the DNA was precipitated with an equal volume of  
807 isopropanol. The DNA was pelleted by centrifugation at 20,000g for 10 minutes at 4°C  
808 and the DNA pellet resuspended in 50 µL Tris-EDTA (TE), pH 8.0 [10 mM Tris-HCl, pH  
809 8.0, 1 mM EDTA, pH 8.0]. The DNA suspension was treated with RNase A (10 mg/mL)  
810 overnight at 55°C and stored at -20°C.

811 Genomic DNA from WT and partial Mlp1 KO strains was digested with *EcoRI* restriction  
812 enzyme overnight at 37°C and separated by electrophoresis on a 1% agarose gel. The  
813 DNA was transferred onto a nitrocellulose membrane by capillary forces, followed by  
814 cross-linking using a UV Stratalinker and drying at 80°C on a Gel Dryer (Bio-Rad). The  
815 membrane was probed using a T4 Polynucleotide Kinase (PNK) <sup>32</sup>P-labeled PCR  
816 product as described in “Northern blotting”.

817

#### 818 Data reproducibility and statistics

819 Mlp1 RIP Northern blot and associated Western blot analysis were performed in  
820 biological triplicates. Mlp1 partial KO strain Northern blots and associated Western blots  
821 were performed in biological triplicates. TGIRT-sequencing of size-excluded Mlp1-RIP,  
822 WT and Mlp1 partial KO strains were performed in biological triplicates. EMSAs and  
823 competition EMSAs were performed in triplicates unless stated otherwise in figure  
824 legends. tRNA-mediates suppression assays in *Schizosaccharomyces pombe* ySH9  
825 strains and associated Northern blots and Western blots were performed in biological  
826 triplicates unless stated otherwise in the figure legend. RNA-immunoprecipitation and  
827 associated Western blots from ySH9 and Sanger sequencing of clonal isolates derived

828 from 3'-RACE were performed in biological duplicates. Comparison of tRNA features in  
829 different eukaryotes was done using the one-way ANOVA for 3'-trailer length ( $F = 289.3$ ,  
830  $DF=6$ ,  $P$  value  $< 0.0001$ ) and mature tRNA length ( $F = 0.9931$ ,  $DF=6$ ,  $P$  value =  $0.428$ ).

831

### 832 Code availability

833 The RNAseq analysis code is available in a Snakemake workflow that can be found at  
834 [https://github.com/etiennefc/t\\_thermophila\\_RNA\\_Seq.git](https://github.com/etiennefc/t_thermophila_RNA_Seq.git).

835

### 836 **Data availability**

837 TGIRT-sequencing has been deposited to the Gene Expression Omnibus (GEO) under  
838 the accession number XXXX).

839

### 840 **References**

- 841 1. Fairley, J. A. *et al.* Human La is found at RNA polymerase III-transcribed genes in vivo.  
842 *Proc. Natl. Acad. Sci. U. S. A.* **102**, 18350–18355 (2005).
- 843 2. Van Horn, D. J., Yoo, C. J., Xue, D., Shi, H. & Wolin, S. L. The La protein in  
844 *Schizosaccharomyces pombe*: a conserved yet dispensable phosphoprotein that functions  
845 in tRNA maturation. *RNA* **3**, 1434–1443 (1997).
- 846 3. Yoo, C. J. & Wolin, S. L. The Yeast La Protein Is Required for the 3' □ Endonucleolytic  
847 Cleavage That Matures tRNA Precursors. **89**, 393–402 (1997).
- 848 4. Bayfield, M. A. & Maraia, R. J. Precursor-product discrimination by La protein during tRNA  
849 metabolism. *Nat. Struct. Mol. Biol.* **16**, 430–437 (2009).

- 850 5. Copela, L. A., Fernandez, C. F., Sherrer, R. L. & Wolin, S. L. Competition between the Rex1  
851 exonuclease and the La protein affects both Trf4p-mediated RNA quality control and pre-  
852 tRNA maturation. *RNA* **14**, 1214–1227 (2008).
- 853 6. Huang, Y., Bayfield, M. A., Intine, R. V. & Maraia, R. J. Separate RNA-binding surfaces on  
854 the multifunctional La protein mediate distinguishable activities in tRNA maturation. *Nat.*  
855 *Struct. Mol. Biol.* **13**, 611–618 (2006).
- 856 7. Tomita, K. & Yamashita, S. Molecular mechanisms of template-independent RNA  
857 polymerization by tRNA nucleotidyltransferases. *Front. Genet.* **5**, (2014).
- 858 8. Bousquet-Antonelli, C. & Deragon, J.-M. A comprehensive analysis of the La-motif protein  
859 superfamily. *Rna* **15**, 750–764 (2009).
- 860 9. Alfano, C. *et al.* Structural analysis of cooperative RNA binding by the La motif and central  
861 RRM domain of human La protein. *Nat. Struct. Mol. Biol.* **11**, 323–329 (2004).
- 862 10. Dong, G., Chakshusmathi, G., Wolin, S. L. & Reinisch, K. M. Structure of the La motif: A  
863 winged helix domain mediates RNA binding via a conserved aromatic patch. *EMBO J.* **23**,  
864 1000–1007 (2004).
- 865 11. Kenan, D. J. & Keene, J. D. La gets its wings. *Nat. Struct. Mol. Biol.* **11**, 303–305 (2004).
- 866 12. Deragon, J. Distribution, organization and evolutionary history of La and LARPs in  
867 eukaryotes. *RNA Biol.* **00**, 1–9 (2020).
- 868 13. Arthur, L. L. *et al.* Rapid generation of hypomorphic mutations. *Nat. Commun.* **8**, 1–15  
869 (2017).
- 870 17. Xue, D., Rubinson, D. A., Pannone, B. K., Yoo, C. J. & Wolin, S. L. U snRNP assembly in  
871 yeast involves the La protein. *EMBO J.* **19**, 1650–1660 (2000).
- 872 18. Gogakos, T. *et al.* Characterizing Expression and Processing of Precursor and Mature  
873 Human tRNAs by Hydro-tRNAseq and PAR-CLIP. *Cell Rep.* **20**, 1463–1475 (2017).

- 874 19. Fan, H., Goodier, J. L., Chamberlain, J. R., Engelke, D. R. & Maraia, R. J. 5' Processing of  
875 tRNA Precursors Can Be Modulated by the Human La Antigen Phosphoprotein. *Mol. Cell.*  
876 *Biol.* **18**, 3201–3211 (1998).
- 877 20. Hussain, R. H., Zawawi, M. & Bayfield, M. A. Conservation of RNA chaperone activity of the  
878 human La-related proteins 4, 6 and 7. *Nucleic Acids Res.* **41**, 8715–8725 (2013).
- 879 21. Naeeni, A. R., Contes, M. R. & Bayfield, M. A. RNA chaperone activity of human La protein  
880 is mediated by variant RNA recognition motif. *J. Biol. Chem.* **287**, 5472–5482 (2012).
- 881 22. Porat, J. & Bayfield, M. A. Use of tRNA-Mediated Suppression to Assess RNA Chaperone  
882 Function. *Methods Mol. Biol. Clifton NJ* **2106**, 107–120 (2020).
- 883 23. Intine, R. V. A. *et al.* Control of Transfer RNA Maturation by Phosphorylation of the Human  
884 La Antigen on Serine 366. *Mol. Cell* **6**, 339–348 (2000).
- 885 24. Huang, Y., Intine, R. V., Mozlin, A., Hasson, S. & Maraia, R. J. Mutations in the RNA  
886 Polymerase III Subunit Rpc11p That Decrease RNA 3' Cleavage Activity Increase 3'-  
887 Terminal Oligo(U) Length and La-Dependent tRNA Processing. *Mol. Cell. Biol.* **25**, 621–636  
888 (2005).
- 889 25. Arhin, G. K., Shen, S., P, I. F., Tschudi, C. & Ullu, E. Downregulation of the essential  
890 Trypanosoma brucei La protein affects accumulation of elongator methionyl-tRNA. **144**,  
891 104–108 (2005).
- 892 26. Bai, C. & Tolia, P. P. Genetic analysis of a La homolog in Drosophila melanogaster.  
893 *Nucleic Acids Res.* **28**, 1078–1084 (2000).
- 894 27. Fleurdépine, S., Deragon, J.-M., Devic, M., Guilleminot, J. & Bousquet-Antonelli, C. A bona  
895 fide La protein is required for embryogenesis in Arabidopsis thaliana. *Nucleic Acids Res.* **35**,  
896 3306–3321 (2007).
- 897 28. Park, J.-M. *et al.* The Multifunctional RNA-Binding Protein La Is Required for Mouse  
898 Development and for the Establishment of Embryonic Stem Cells. *Mol. Cell. Biol.* **26**, 1445–  
899 1451 (2006).



- 900 29. Behrens, A., Rodschinka, G. & Nedialkova, D. D. High-resolution quantitative profiling of  
901 tRNA abundance and modification status in eukaryotes by mim-tRNAseq. *Mol. Cell* **81**,  
902 1802-1815.e7 (2021).
- 903 30. Tuller, T. *et al.* An Evolutionarily Conserved Mechanism for Controlling the Efficiency of  
904 Protein Translation. *Cell* **141**, 344–354 (2010).
- 905 31. Bogenhagen, D. F. & Brown, D. D. Nucleotide sequences in Xenopus 5S DNA required for  
906 transcription termination. *Cell* **24**, 261–270 (1981).
- 907 32. Leontis, N., DaLio, A., Strobel, M. & Engelke, D. Effects of tRNA-intron structure on  
908 cleavage of precursor tRNAs by RNase P from *Saccharomyces cerevisiae*. *Nucleic Acids*  
909 *Res.* **16**, 2537–2552 (1988).
- 910 33. Wu, J. *et al.* Cryo-EM Structure of the Human Ribonuclease P Holoenzyme. *Cell* **175**, 1393-  
911 1404.e11 (2018).
- 912 34. True, H. L. & Celander, D. W. Ribonuclease P of *Tetrahymena thermophila* \*. **271**, 16559–  
913 16566 (1996).
- 914 35. Lee, Y. *et al.* Nuclear pre-tRNA terminal structure and RNase P recognition. *RNA N. Y.* **3**,  
915 175–185 (1997).
- 916 36. Nashimoto, M., Nashimoto, C., Tamura, M., Kaspar, R. L. & Ochi, K. The inhibitory effect of  
917 the autoantigen La on in vitro 3' processing of mammalian precursor tRNAs. *J. Mol. Biol.*  
918 **312**, 975–984 (2001).
- 919 37. Kufel, J. & Tollervey, D. 3'-processing of yeast tRNA<sup>Trp</sup> precedes 5'-processing. *RNA N. Y.*  
920 **9**, 202–208 (2003).
- 921 38. Kufel, J., Allmang, C., Verdone, L., Beggs, J. D. & Tollervey, D. Lsm proteins are required  
922 for normal processing of pre-tRNAs and their efficient association with La-homologous  
923 protein Lhp1p. *Mol. Cell. Biol.* **22**, 5248–5256 (2002).
- 924 39. Sievers, F. *et al.* Fast, scalable generation of high-quality protein multiple sequence  
925 alignments using Clustal Omega. *Mol. Syst. Biol.* **7**, 539 (2011).

- 926 40. Kelley, L. A., Mezulis, S., Yates, C. M., Wass, M. N. & Sternberg, M. J. E. The Phyre2 web  
927 portal for protein modeling, prediction and analysis. *Nat. Protoc.* **10**, 845–858 (2015).
- 928 41. Zheng, W. *et al.* LOMETS2: improved meta-threading server for fold-recognition and  
929 structure-based function annotation for distant-homology proteins. *Nucleic Acids Res.* **47**,  
930 W429–W436 (2019).
- 931 42. Stover, N. A., Punia, R. S., Bowen, M. S., Dolins, S. B. & Clark, T. G. Tetrahymena genome  
932 database Wiki: a community-maintained model organism database. *Database* **2012**, bas007  
933 (2012).
- 934 43. Fillingham, J. S., Bruno, D. & Pearlman, R. E. Cis-acting requirements in flanking DNA for  
935 the programmed elimination of mse2.9: a common mechanism for deletion of internal  
936 eliminated sequences from the developing macronucleus of *Tetrahymena thermophila*.  
937 *Nucleic Acids Res.* **29**, 488–498 (2001).
- 938 44. Mochizuki, K. High efficiency transformation of *Tetrahymena* using a codon-optimized  
939 neomycin resistance gene. *Gene* **425**, 79–83 (2008).
- 940 45. Chalker, D. L. Transformation and strain engineering of *Tetrahymena*. *Methods Cell Biol.*  
941 **109**, 327–345 (2012).
- 942 46. Merriam, E. V. & Bruns, P. J. Phenotypic Assortment in *Tetrahymena Thermophila*:  
943 Assortment Kinetics of Antibiotic-Resistance Markers, Tsa, Death, and the Highly Amplified  
944 Rdna Locus. *Genetics* **120**, 389–395 (1988).
- 945 47. Fafard-Couture, É., Bergeron, D., Couture, S., Abou-Elela, S. & Scott, M. S. Annotation of  
946 snoRNA abundance across human tissues reveals complex snoRNA-host gene  
947 relationships. *Genome Biol.* **22**, 172 (2021).
- 948 48. Nottingham, R. M. *et al.* RNA-seq of human reference RNA samples using a thermostable  
949 group II intron reverse transcriptase. *RNA N. Y. N* **22**, 597–613 (2016).
- 950 49. Bolger, A. M., Lohse, M. & Usadel, B. Trimmomatic: a flexible trimmer for Illumina sequence  
951 data. *Bioinforma. Oxf. Engl.* **30**, 2114–2120 (2014).

- 952 50. Sheng, Y. *et al.* The completed macronuclear genome of a model ciliate *Tetrahymena*  
953 *thermophila* and its application in genome scrambling and copy number analyses. *Sci.*  
954 *China Life Sci.* **63**, 1534–1542 (2020).
- 955 51. Dobin, A. & Gingeras, T. R. Optimizing RNA-Seq Mapping with STAR. in *Data Mining*  
956 *Techniques for the Life Sciences* (eds. Carugo, O. & Eisenhaber, F.) 245–262 (Springer,  
957 2016). doi:10.1007/978-1-4939-3572-7\_13.
- 958 52. Deschamps-Francoeur, G., Boivin, V., Abou Elela, S. & Scott, M. S. CoCo: RNA-seq read  
959 assignment correction for nested genes and multimapped reads. *Bioinformatics* **35**, 5039–  
960 5047 (2019).
- 961 53. Love, M. I., Huber, W. & Anders, S. Moderated estimation of fold change and dispersion for  
962 RNA-seq data with DESeq2. *Genome Biol.* **15**, 550 (2014).
- 963 54. Vinayak, J. *et al.* Human La binds mRNAs through contacts to the poly(A) tail. *Nucleic Acids*  
964 *Res.* **46**, 4228–4240 (2018).
- 965 55. Chan, P. P. & Lowe, T. M. GtRNADB 2.0: an expanded database of transfer RNA genes  
966 identified in complete and draft genomes. *Nucleic Acids Res.* **44**, D184–D189 (2016).
- 967 56. Sprinzl, M., Horn, C., Brown, M., Ioudovitch, A. & Steinberg, S. Compilation of tRNA  
968 sequences and sequences of tRNA genes. *Nucleic Acids Res.* **26**, 148–153 (1998).
- 969 57. Crooks, G. E., Hon, G., Chandonia, J.-M. & Brenner, S. E. WebLogo: A Sequence Logo  
970 Generator. *Genome Res.* **14**, 1188–1190 (2004).
- 971 58. Wenkert, D. & Allis, C. D. Timing of the appearance of macronuclear-specific histone variant  
972 hv1 and gene expression in developing new macronuclei of *Tetrahymena thermophila*. *J.*  
973 *Cell Biol.* **98**, 2107–2117 (1984).

974

## 975 **Acknowledgements**

976 We thank R.J. Maraia and J-M. Deragon for comments on the manuscript. This work  
977 was funded by the Canadian Institutes of Health Research's Institute of Genetics (to  
978 M.A.B).

979

## 980 **Author Contributions**

981 K.K. performed most experiments. J.G. and R.P. provided Tetrahymena WT strains,  
982 generated the Mlp1 partial KO strain and associated confirmation (southern blot and  
983 PCR). S.A.E. performed cDNA TGIRT library preparation and sequencing and E.F-C.,  
984 M.S. the associated bioinformatic analysis. K.K and M.A.B. designed the study,  
985 analysed the data, and wrote the paper.

986

## 987 **Additional Information**

988 **Competing Interests Statement:** The authors declare that they have no competing  
989 interests.

990

991 **Correspondence and Materials Requests** should be addressed to M.A.B.

992

## 993 **Figure Legends**

994 **Figure 1. Alveolate La proteins are predicted to have a La motif (LaM) but not an**  
995 **RNA recognition motif-1 (RRM1)**

996 **(A)** Schematic representation of RNA-binding domains found in La and La-related  
997 protein-7 (LARP7) from different eukaryotes. The LaM and RRM together form the La  
998 module responsible for uridylate binding through formation of a hydrophobic binding  
999 pocket between the two domains. LaM: La motif, RRM: RNA-recognition motif, DUF:  
1000 Domain of Unknown Function.

1001 **(B)** Primary amino acid alignments from different eukaryotic lineages showing  
1002 conservation of uridylate binding residues (highlighted, bottom). A dark grey background  
1003 indicates identical residues, light grey conserved residues and white indicates no  
1004 conservation. Color coded legend is shown in Figure 1A. Full LaM and RRM1 domains  
1005 shown in Figure S1A,B.

1006 **(C)** Secondary structure predictions of LaM and RRM1 from different eukaryotic  
1007 lineages. Predicted  $\beta$ -sheets shown in red and predicted  $\alpha$ -helices in blue (dark blue:  
1008 typical  $\alpha$ -helices found in the winged-helix fold and classic RRM, light blue: inserted  $\alpha$ -  
1009 helices found in La proteins specifically) are compared against the secondary structure  
1010 motif of the hLa protein crystal structure on the top (PDB: 2VOD). Location of the  
1011 conserved amino acid residues important for uridylate binding are shown at the bottom.  
1012 Color coded legend is shown in Figure 1A.

1013

1014 **Figure 2. Mlp1 preferentially binds pre-tRNAs partially via the 3'-terminal**  
1015 **uridylates.**

1016 **(A)** Northern blot analysis of Mlp1 ribonucleoprotein-immunoprecipitated (RIP) samples  
1017 from *Tetrahymena thermophila*. Mlp1 enriches pre-tRNAs more efficiently than mature  
1018 tRNAs. Pre-tRNA Ile<sup>UAU</sup> and Leu<sup>UAA</sup> are both recognized by 3'-trailer probe used. 5.8S

1019 rRNA was used as a non-binding loading control. FT: flowthrough, IgG: immunoglobulin G  
1020 control antibody. Western blot confirming Mlp1-specific immunoprecipitation is shown in  
1021 Figure S2A.

1022 **(B)** Next generation sequencing data of tRNAs using TGIRT-Seq (columns represent  
1023 replicates), shown as a heatmap of log<sub>2</sub> transformed fold enrichment calculated by  
1024 taking ratios of normalized Mlp1-immunoprecipitated tRNA and input tRNA counts per  
1025 million (CPM) for different tRNA isotypes (top). Next generation tRNA sequencing data  
1026 from Gogakos *et al.* analyzed similarly for hLa (bottom). The log<sub>2</sub> transformed fold  
1027 enrichment was calculated by taking ratios of normalized hLa-immunoprecipitated tRNA  
1028 and the averaged input tRNAs CPM. The data was split between premature and mature  
1029 tRNAs based on the 3'-end of the transcript (-CCA ending mature tRNAs and U-ending  
1030 pre-tRNAs).

1031 **(C)** Schematic representation of <sup>32</sup>P-labeled pre-tRNA intermediates containing 5'-  
1032 leader and 3'-trailer, 5'-leader only, 3'-trailer only and mature tRNA used in D-I and  
1033 Figure S2D,E.

1034 **(D-I)** Binding curves from EMSAs comparing <sup>32</sup>P-labeled Leu<sup>AAG</sup> 5'-leader, 3'-trailer  
1035 containing pre-tRNA and mature Leu<sup>AAG</sup> tRNA. Native gels are shown in Figure S3A  
1036 and K<sub>d</sub> quantification in Table 1.

1037 **(J)** Binding curves comparing binding of hLa, Mlp1 and Mlp1 mutants to <sup>32</sup>P-labeled  
1038 CUGCUGUUUU-3'OH RNA. Native gels are shown in Figure S3A and quantification in  
1039 Table 1.

1040 **(K)** Binding curves from competition EMSA between <sup>32</sup>P-labeled 5'-leader containing  
1041 pre-tRNA containing a 5'-triphosphate (+5'PPP) and unlabelled competitors +5'PPP as

1042 a positive control and 5'-triphosphate removed pre-tRNA (-5'PPP). Standard deviation  
1043 between replicates is shown as error bars (n=2). Native gels are shown in Figure  
1044 S3D,E.

1045

1046 **Figure 3. Mlp1 does not discriminate 3'-uridyates as stringently as hLa.**

1047 **(A-B)** Binding curves from competition EMSA between <sup>32</sup>P-labeled uridyate RNA (U10)  
1048 and unlabelled competitor U10 RNA (control), 5'-leader and 3'-trailer containing pre-  
1049 tRNA and mature tRNA for hLa (A) and Mlp1 (B). Standard deviation between replicates  
1050 is shown as error bars (Mlp1 U10: n=4, tRNA: n=2, hLa U10: n=2, tRNA: n=1). Native  
1051 gels are shown in Figure S4A.

1052 **(C)** Three-dimensional representation of the hLa protein in complex with uridyate RNA  
1053 with the last three terminal nucleotides shown (UUU-3'OH ) (PDB: 2VOD). The  
1054 penultimate uridyate U<sub>2</sub> is positioned in between the LaM and RRM1, while the 3'-  
1055 terminal uridyate U<sub>1</sub> is positioned more towards the outside in stacking formation with  
1056 U<sub>3</sub>. RNA is shown in yellow; β-sheets are shown in red and α-helices shown in blue  
1057 (dark blue: typical α-helices found in the winged-helix fold and classic RRM, light blue:  
1058 inserted α-helices specifically found in La proteins). Image generated using PyMOL.

1059 **(D-E)** Binding curves from competition EMSAs using P<sup>32</sup>-labeled wild type  
1060 CUGCUGUUUU (4U) and unlabelled 4U and mutant RNAs: CUGCUGUUUC (U<sub>1</sub>C),  
1061 CUGCUGUUCU (U<sub>2</sub>C), CUGCUGUCUU (U<sub>3</sub>C) and CUGCUGCCCC (4C) for hLa (D)  
1062 or Mlp1 (E). Standard deviation between replicates is shown as error bars (n=2). Native  
1063 gels are shown in Figure S4B,C.

1064 **(F)** Magnified views of hLa and 3'-terminal uridyate U<sub>1</sub> interactions (PDB: 2VOD)

1065 demonstrating the importance of the 3'-end. Protein carbon backbones have the same  
1066 color coding as in C, oxygen is shown in red, nitrogen is shown in blue and  
1067 phosphorous is shown in orange. RNA is shown in yellow. Image generated using  
1068 PyMOL.

1069 **(G,H)** Binding curves from competition EMSA between P<sup>32</sup>-labeled U10-3'OH and  
1070 unlabelled U10-3'OH (control) and U10-3'-P (degraded RNA mimic) for hLa (G) and  
1071 Mlp1 (H). Standard deviation between replicates is shown as error bars (n=2). Native  
1072 gels are shown in Figure S4D.

1073

1074 **Figure 4. Mlp1 promotes tRNA mediated suppression in the absence of protection**  
1075 **of 3'-trailers.**

1076 **(A)** tRNA-mediated suppression assay *Schizosaccharomyces pombe* ySH9 strain  
1077 transformed with pRep4 encoded Sla1p (positive control; *S. pombe* La protein), Mlp1 or  
1078 indicated Mlp1 mutants. Top: diagram showing domain architecture of Mlp1.

1079 **(B)** Northern blot to determine 3'-end protection of suppressor pre-tRNA-Ser<sup>UCA</sup> in ySH9  
1080 transformants shown in A (n=2). Accumulation of suppressor pre-tRNA Ser<sup>UCA</sup> was  
1081 determined using an intron complementary probe and mature tRNA using a tRNA body  
1082 probe leading to detection of both pre-tRNA and mature tRNA. Excess unlabeled probe  
1083 complementary to endogenous Ser<sup>UGA</sup> was added to avoid cross-reaction between  
1084 suppressor tRNA and endogenous tRNA. U5: loading control.

1085 **(C)** Northern blot to determine 3'-end protection of endogenous pre-tRNA Lys<sup>CUU</sup> in  
1086 ySH9 transformants shown in A. Accumulation of pre-tRNA Lys<sup>CUU</sup> intermediates was  
1087 determined using an intron complementary probe which detects unprocessed 5'-leader



1088 and 3'-trailer containing pre-tRNA (top band), 5'-leader processed pre-tRNA (middle  
1089 band) and both 5'-leader and 3'-trailer processed pre-tRNA (bottom band) in sla1  
1090 transformants (positive control; lane 2). The same blot was probed with a 3'-trailer  
1091 complementary probe, a 5'-leader complementary probe and a mature tRNA  
1092 complementary probe. Black boxes correspond to a marker size of 100 nt. U5: loading  
1093 control.

1094 **(D)** Sanger sequencing of clonal isolates corresponding to cDNAs derived from 3'-  
1095 terminal sequences from Sla1p and Mlp1-immunoprecipitated pre-tRNAs in ySH9 as  
1096 transformed in A-C.

1097

1098 **Figure 5. Depletion of Mlp1 results in altered pre-tRNA processing in**

1099 ***Tetrahymena thermophila* with normal levels of mature tRNAs.**

1100 **(A)** Western blot confirming decreased protein expression of Mlp1 in the partial  
1101 knockout (KO) strain compared to the wild type (WT) strain. Loading control: histone H3  
1102 and  $\beta$ -actin.

1103 **(B)** Northern blot detecting tRNAs Ile<sup>UAU</sup>, Leu<sup>UAA</sup>, Val<sup>CAC</sup> and Tyr<sup>GUA</sup> pre-tRNA  
1104 intermediates with an intron, 5'-leader, and 3'-trailer specific probe. Pre-tRNA Ile<sup>UAU</sup> and  
1105 Leu<sup>UAA</sup> are both recognized by 3'-trailer and 5'-leader probe used. Black boxes  
1106 correspond to a marker of the same size. U5 snRNA and/or 5.8S rRNA were used as  
1107 loading controls.

1108 **(C)** Next generation sequencing data using TGIRT-Seq shown as a heatmap of log<sub>10</sub>  
1109 transformed normalized cumulative pre-tRNA counts for each uridylylate tail length. For  
1110 clarity, the average is plotted and the longest uridylylate tail shown is U<sub>6</sub> (UUUUUU-

1111 3'OH).

1112 **(D)** Quantification of uridylate tail length from TGIRT-Seq data in (C). For each tRNA  
1113 isodecoder, the presence of a uridylate tail length (U1, U2, etc.) was scored as present  
1114 if its abundance the CPM was greater than 0.3;  $\log_{10}(2)$ .

1115 **(E-F)** Scatterplots of  $\log_2$  transformed normalized tRNA counts (CPM) from TGIRT-Seq  
1116 data from WT strains (E) and KO strains (F) plotted against the number of genes per  
1117 tRNA isotype encoded in the genome (**Table S4**). The correlation was calculated, and a  
1118 positive correlation was observed for both WT and KO strains ( $r = 0.746$  and  $r = 0.731$ ,  
1119 respectively) indicating that more tRNA gene copies result in higher tRNA expression.

1120 **(G)** Plotting of  $\log_2$  transformed normalized WT and partial Mlp1 KO counts (CPM)  
1121 gives a strong positive correlation ( $r = 0.970$ ).

1122 **(H)** Northern blot analysis detecting mature tRNA Tyr<sup>GUA</sup> and Arg<sup>UCU</sup> levels using a  
1123 probe specific for the spliced mature tRNA. U5 was used as a loading control on both  
1124 membranes.

1125

1126 **Figure 6. The 3'-trailer length of *Tetrahymena thermophila* tRNAs is considerably**  
1127 **shorter compared to other eukaryotes and affects the N<sub>1</sub> composition of the 5'-**  
1128 **leader.**

1129 **(A)** Genome-wide determination of 3'-trailer lengths as determined by the number of  
1130 nucleotides between the discriminator base (the most 3'-terminal nucleotide in the  
1131 mature tRNA upstream of the posttranscriptional added CCA) and a genomic stretch of  
1132 four Ts of different eukaryotes. Violin plots shows the median as a full purple line and  
1133 the quartiles as full black lines. Statistical significance ( $P < 0.05$ ) was found between all

1134 species, except between *Saccharomyces cerevisiae* and *Schizosaccharomyces pombe*,  
1135 *Schizosaccharomyces pombe* and *Arabidopsis thaliana*, and *Drosophila melanogaster*,  
1136 *M. musculus* and *H. sapiens* after comparison using a one-way ANOVA and Tukey's  
1137 multiple comparison test.

1138 **(B)** Genome-wide analysis of mature tRNA length for different eukaryotes. Violin plots  
1139 show the median as a full purple line and the quartiles as full black lines. No statistical  
1140 significance ( $P < 0.05$ ) was observed using a one-way ANOVA and Tukey's multiple  
1141 comparison test.

1142 **(C)** Schematic representation of a pre-tRNA. The mature tRNA sequence is shown as a  
1143 black rectangle and written in uppercase (UCGA) in the tRNA cartoon. Pre-tRNA  
1144 specific sequences, including the 5'-leader and 3'-trailer are shown as a black line and  
1145 written in lowercase (ucga) in the tRNA cartoon. The discriminator base ( $N_{73}$ ) is the  
1146 most 3'-terminal nucleotide of the mature tRNA sequence highlighter in dark green. The  
1147 most 3'-terminal nucleotide of the 5'-leader sequence is highlighted with a light green  
1148 box ( $N_{1}$ ).

1149 **(D,E)** Logo analysis of 5'-leader sequences of pre-tRNAs in *Tetrahymena thermophila*,  
1150 *Schizosaccharomyces pombe* and *Homo sapiens* (D). The same analysis split by the  
1151 discriminator base identity (E). The number of pre-tRNAs representing each condition is  
1152 shown underneath each logo.

1153

### 1154 **Figure 7. Model for pre-tRNA processing in *Tetrahymena thermophila*.**

1155 During La-dependent processing (top, left) in previously studied eukaryotes such as  
1156 yeast, the La protein is the first protein to associate with pre-tRNAs on the 3'-stretch of

1157 uridylates generated by RNA polymerase III transcription termination. Binding of La  
1158 provides protection from degradation by 3'-exonucleases, assists with tRNA folding  
1159 through RNA chaperone activity and stabilizes the nascent pre-tRNA. The next step in  
1160 tRNA processing is endonucleolytic removal of the 5'-leader by RNase P, followed by  
1161 an endonucleolytic cut by RNase Z resulting in removal of the 3-trailer sequence and  
1162 the La protein bound to the uridylylate stretch. In contrast, during La-independent  
1163 processing of pre-tRNAs (top, right), the 3'-trailer is rapidly removed first by 3'-  
1164 exonucleases such as Rex1p, followed by RNase P processing resulting in an end-  
1165 mated tRNA. Our data from *Tetrahymena thermophila* point towards a pre-tRNA  
1166 processing model in which Mlp1-dependent processing (bottom, left) 3'-trailers are  
1167 processed efficiently. Mlp1-independent processing results in accumulation of pre-  
1168 tRNAs containing unprocessed 3'-trailer sequences, indicating that Mlp1 is required for  
1169 efficient 3'-end processing unlike other eukaryotes. Image created with BioRender.

1

A

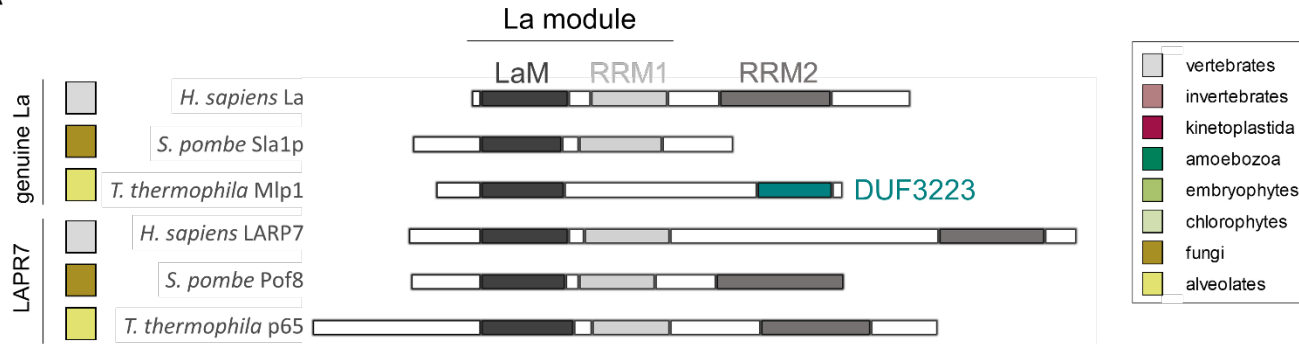

B

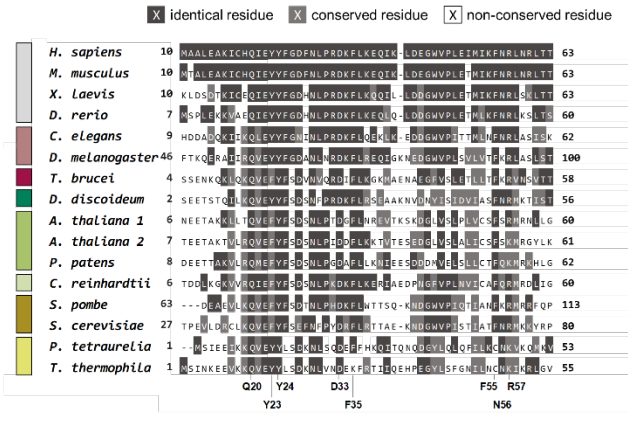

C

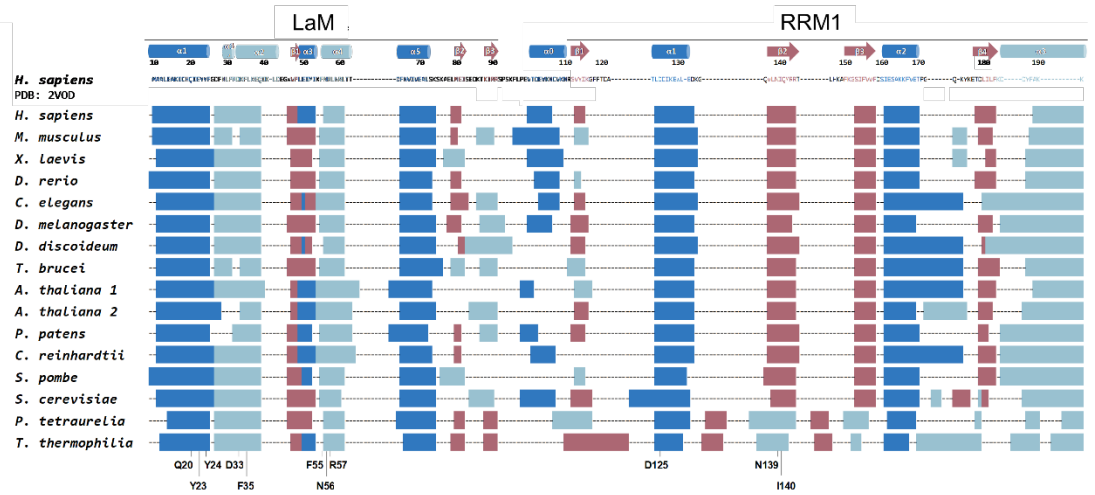

2

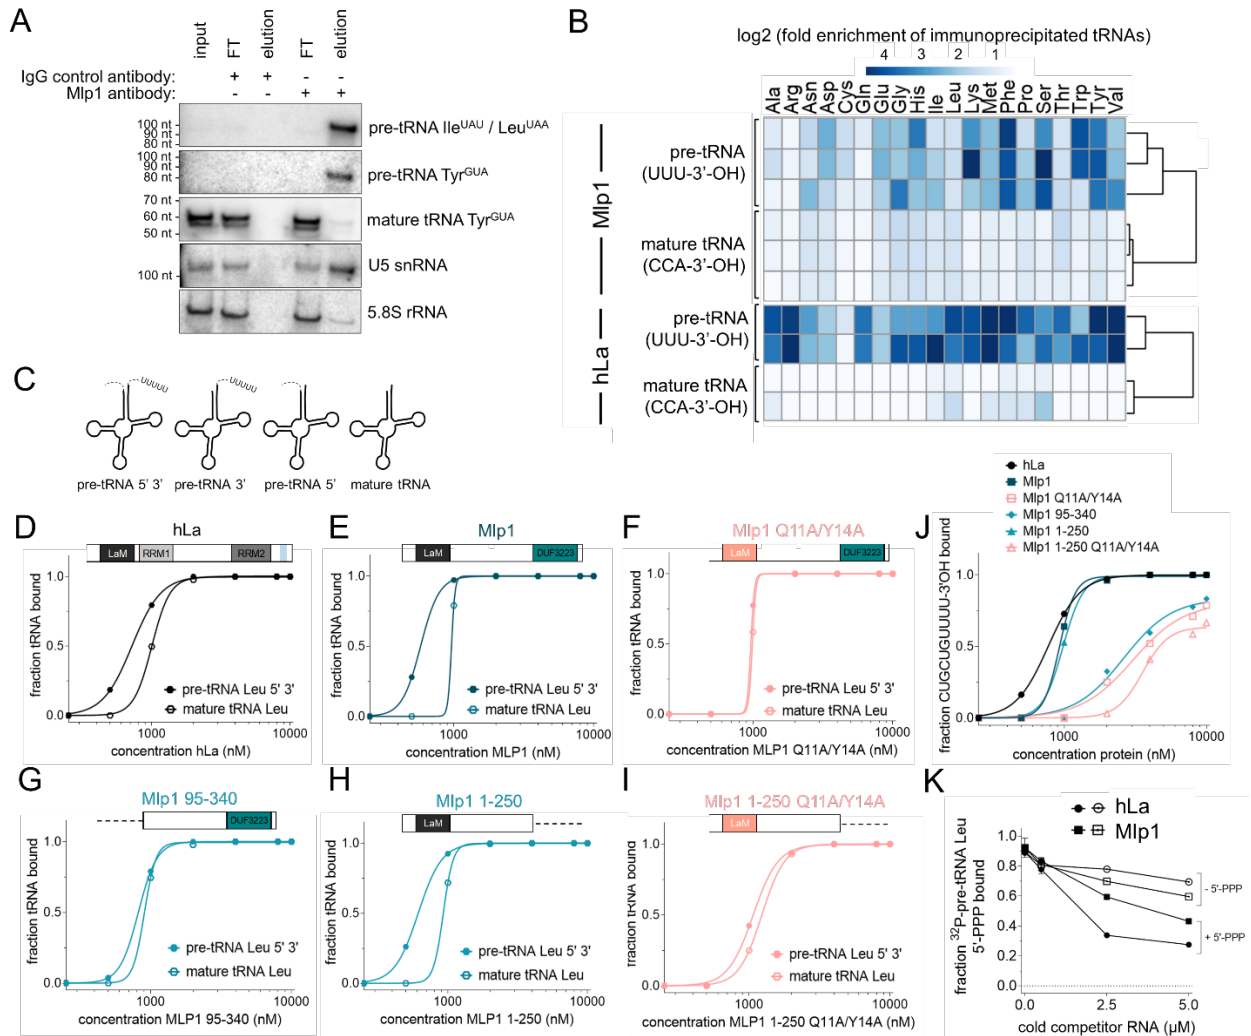

3

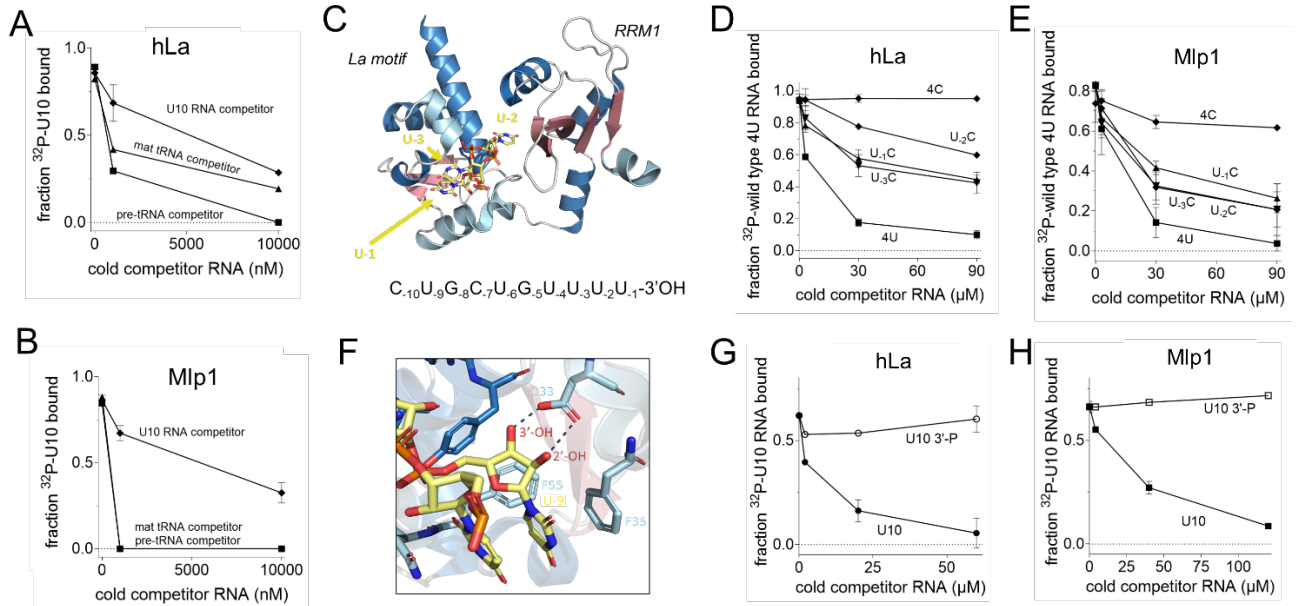





5

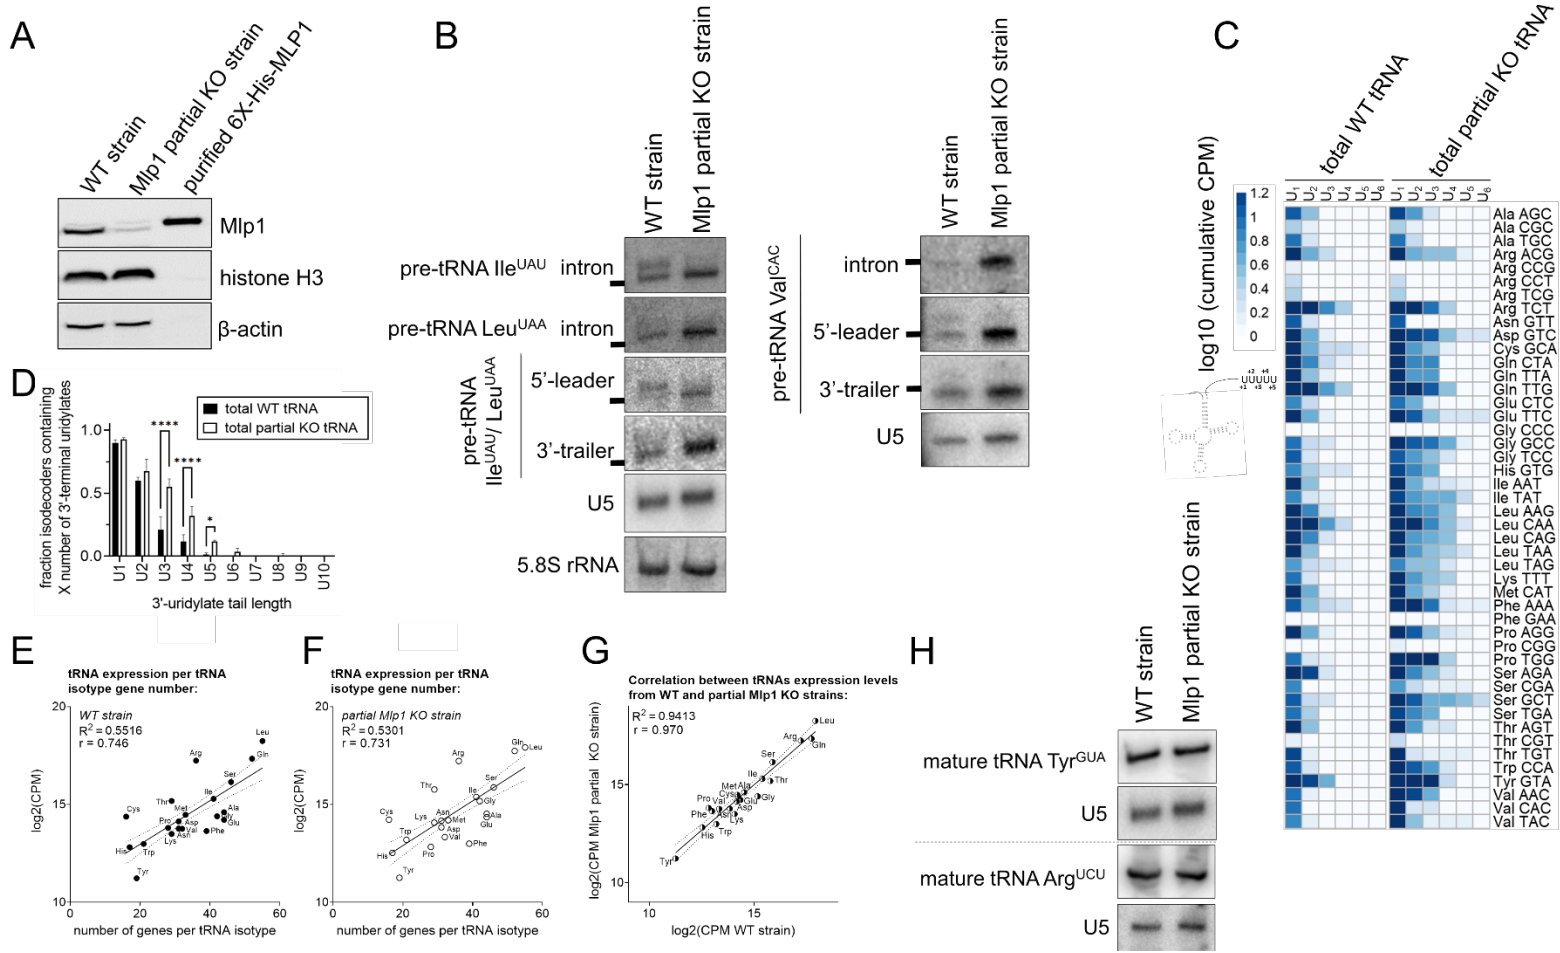



# 7

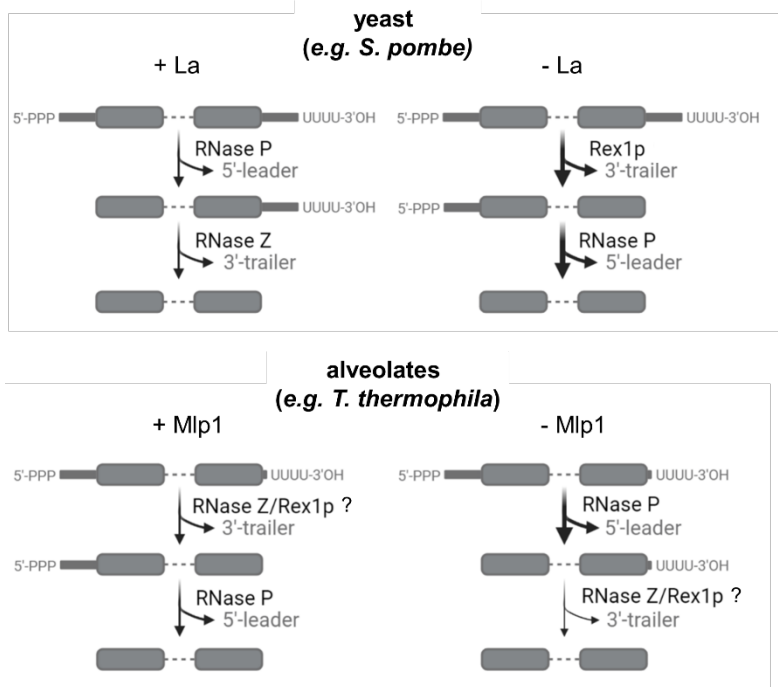

Source: https://www.biorxiv.org/content/10.1101/2022.06.07.494954v1.full.pdf
