# Supplementary material for: Altered tRNA processing is linked to a distinct and unusual La protein in Tetrahymena thermophila
Source: bioRxiv or medRxiv preprint supplement (doi:10.1101/2022.06.07.494954), 2022-06-07
Supplement: Supplementary file [file media-1.pdf]

## Description of Additional Supplementary Data

**Supplementary Data 1.** TGIRT-sequencing normalized tRNA counts from *Tetrahymena thermophila* samples.

Next generation sequencing tRNA counts are shown as transcripts per million (TPM). Biological triplicates were analysed. MLP1\_IPx: size-excluded MLP1-associated RNAs following ribonucleoprotein-immunoprecipitation, WTx: size-excluded total RNA from wild type (WT) strain, MLP1\_KOx: size-excluded total RNA from the partial MLP1 knockout (KO) strain. MLP1\_WT and MLP1\_IP are paired samples obtained from the same biological replicate. Relatively lowly expressed transcripts are shown in grey (TPM < 1).

**Supplementary Data 2.** Input sequences for custom Python script to obtain raw counts for 3'-U ending and 3'-CCA ending tRNAs from raw .fastq files.

*Tetrahymena thermophila* tRNA sequences were screened for unique "fishing" sequences in the 3'-end of the mature tRNA for each isoacceptor (see Summary Table, right) in order to obtain counts for mature tRNAs (ending in -CCA) and pre-tRNAs (ending in different length of -U) (see Table S2 and S3).

**Supplementary Data 3.** Sequence information for pre-tRNA and mature tRNAs from different eukaryotic species.

The genomic sequences for *Homo sapiens*, *Mus musculus*, *Drosophila melanogaster*, *Arabidopsis thaliana*, *Saccharomyces cerevisiae* and *Schizosaccharomyces pombe* were obtained from the Genomic tRNA Database (GtRNAdb) and *T. thermophila* from the UCSC Genome Browser.
